1 **Transcriptomics supports that pleuropodia of insect embryos function in**  
2 **degradation of the serosal cuticle to enable hatching**

3

4 **Authors**

5 Barbora Konopová<sup>1,2,\*</sup>, Elisa Buchberger<sup>2</sup>, Alastair Crisp<sup>3</sup>

6 <sup>1</sup> Department of Zoology, University of Cambridge, United Kingdom

7 <sup>2</sup> Department of Developmental Biology, University of Göttingen, Germany

8 <sup>3</sup> MRC Laboratory of Molecular Biology, Cambridge, United Kingdom

9

10 \* author for correspondence: [barbora.konopova@biologie.uni-goettingen.de](mailto:barbora.konopova@biologie.uni-goettingen.de)

11

12 EB: [elisa.buchberger@biologie.uni-goettingen.de](mailto:elisa.buchberger@biologie.uni-goettingen.de)

13 AC: [acrisp@mrc-lmb.cam.ac.uk](mailto:acrisp@mrc-lmb.cam.ac.uk)

14

15 **Keywords**

16 insect, Orthoptera, RNA-seq, pleuropodia, embryonic organ, gland, moulting fluid,

17 chitinase, immunity, ecdysone

18 **ABSTRACT**

19

20 Pleuropodia are limb-derived vesicular organs that transiently appear on the first  
21 abdominal segment of embryos from the majority of insect “orders”. They are  
22 missing in the model *Drosophila* and little is known about them. Experiments  
23 carried out on orthopteran insects eighty years ago indicated that the pleuropodia  
24 secrete a “hatching enzyme” that at the end of embryogenesis digests the serosal  
25 cuticle to enable the larva to hatch. This hypothesis contradicts the view that insect  
26 cuticle is digested by enzymes produced by the tissue that deposited it. We studied  
27 the development of the pleuropodia in embryos of the locust *Schistocerca gregaria*  
28 (Orthoptera) using transmission electron microscopy. RNA-seq was applied to  
29 generate a comprehensive embryonic reference transcriptome that was used to  
30 study genome-wide gene expression of ten stages of pleuropodia development. We  
31 show that the mature and secretion releasing pleuropodia are primarily enriched in  
32 transcripts associated with transport functions. They express genes encoding  
33 enzymes capable of digesting cuticular protein and chitin. These include the potent  
34 cuticulo-lytic Chitinase 5, whose transcript rises just before hatching. The  
35 pleuropodia are also enriched in transcripts for immunity-related enzymes,  
36 including the Toll signaling pathway, melanization cascade and lysozymes. These  
37 data provide transcriptomic evidence that the pleuropodia of orthopterans produce  
38 the “hatching enzyme”, whose important component is the Chitinase 5. They also  
39 indicate that the organs facilitate epithelial immunity and may function in

40 embryonic immune defense. Based on their gene expression the pleuropodia appear  
41 to be an essential part of insect physiology.

## 42 INTRODUCTION

43

44 An integral part of insect embryogenesis is the transient appearance of enigmatic  
45 glandular organs on the first abdominal segment (A1) that are called the  
46 pleuropodia (Rathke, 1844; Wheeler, 1889) (Figure 1A-C). These are paired  
47 structures that form external vesicles in some species while in others they sink  
48 down into the body wall (reviewed in e.g., Wheeler, 1889; Hussey, 1926; Roonwall,  
49 1937). The pleuropodia are peculiarly modified limbs (Machida, 1981; Bennett,  
50 1999; Lewis, 2000) (Figure 1D,E): their buds emerge in a line with the buds for the  
51 walking legs, but unlike the legs, the pleuropodia remain short, the majority of their  
52 cells massively enlarge and develop into a transporting-like and secretory  
53 epithelium (Bullière, 1970; Louvet, 1973; Louvet, 1975; Stay, 1977). The  
54 pleuropodia degenerate before hatching and are absent in larvae. They have been  
55 found in at least some species of nearly all insect “orders” (Figure 1F), but are  
56 absent in others, like Diptera, Hymenoptera and advanced Lepidoptera such as  
57 silkworms (e.g., Graber, 1889; Hussey, 1926; Hagan, 1931; Roonwall, 1937; Miller,  
58 1940; Ando, 1962; Stanley and Grundmann, 1970; Ando and Haga, 1974; Bedford,  
59 1978; Miyakawa, 1979; Machida, 1981; Norling 1982; Larink, 1983; Louvet, 1983;  
60 Kamiya and Ando, 1985; Tanaka et al., 1985; Kobayashi and Ando, 1990; Heming,  
61 1993; Kobayashi et al., 2003; Lambiase et al., 2003; Machida et al., 2004; Rost et al.,  
62 2004; Uchifune and Machida, 2005; Tsutsumi and Machida, 2006; Mashimo et al.,  
63 2013; Fraulob et al., 2015). Perhaps because the pleuropodia are missing in the  
64 genetic model *Drosophila*, they have been neglected in recent decades. Their

65 function has remained unclear and the genes expressed during their active stages  
66 are unknown.  
67  
68 Eighty years ago Eleanor Slifer (Slifer, 1937; 1938) demonstrated that the  
69 pleuropodia of grasshoppers (Orthoptera) are necessary for the digestion of the  
70 serosal cuticle (SC) before hatching, to enable the larva to get out of the egg. The SC  
71 is a chitin and protein-containing sheet structurally similar to the larval or adult  
72 cuticles and is produced by the extraembryonic serosa in early embryogenesis  
73 (Goltsev et al., 2009; Jacobs et al., 2015). Shortly before hatching the inner layer of  
74 the SC (procuticle) disappears. Slifer (Slifer, 1937) showed that when the  
75 pleuropodia are removed from the embryos, the SC remains thick and the larva  
76 stays arrested in the egg. She proposed that the pleuropodia secrete the “hatching  
77 enzyme”, a substance likely similar to the cuticle degrading moulting fluid (MF) that  
78 is released by the larval epidermis under the old cuticle when the insect is preparing  
79 to moult (Reynolds and Samuels, 1996). The exact molecular composition of this  
80 “hatching enzyme” is unknown.  
81  
82 The endocrinologists Novak and Zambre (Novak and Zambre, 1974) argued that this  
83 would be an unusual way to digest a cuticle. During larval moulting (Nijhout, 1994)  
84 the larval epidermal cells deposit a cuticle and subsequently it is the same  
85 epidermal cells, not a special gland that secretes the cuticle degrading MF. Therefore  
86 they proposed that the SC degrading enzymes would most probably be secreted by  
87 the serosa itself. They proposed that the pleuropodia instead secrete the moulting

88 hormone “ecdysone”, which then stimulates the serosa to secrete the “hatching  
89 enzyme”. They also suggested that the pleuropodia reach the peak of their activity in  
90 very young embryos during katrepsis when the serosa is still present (Panfilio,  
91 2008).

92

93 In some insects, including locusts, ultrastructural studies (Bullière, 1970; Louvet,  
94 1973; Louvet, 1975; Rost et al., 2004; Viscuso and Sottile, 2008) have indeed shown  
95 that the pleuropodia secrete granules similar to the “ecdysial droplets” carrying the  
96 MF (Locke and Krishnan, 1973). Some of the Slifer’s experiments (Slifer, 1937) were  
97 successfully repeated by others (Jones, 1956) and a substance capable of digesting  
98 pieces of SC was even isolated from the pleuropodia (Shutts, 1952). But a proper  
99 validation by the state-of-the-art genetic methods that the pleuropodia express  
100 genes for enzymes capable to digest the SC is missing.

101

102 Here, we identified the mRNAs expressed in the pleuropodia of the locust  
103 *Schistocerca gregaria* (Orthoptera). We chose *Schistocerca* as an ideal model,  
104 because it has large embryos (eggs over 7 mm) and external pleuropodia that can  
105 easily be dissected out, and because the previous experiments testing the function of  
106 pleuropodia were carried out in orthopterans. We studied the development of the  
107 pleuropodia including using transmission electron microscopy (TEM), and by high-  
108 throughput RNA sequencing (RNA-seq) generated transcriptomes from ten  
109 morphologically defined stages. We performed differential gene expression analysis  
110 between the pleuropodia and similarly aged hind legs. For mapping of reads we

111 assembled a transcriptome from whole embryos. The goal of this paper was to  
112 investigate whether the observed gene expression profile of the pleuropodia is  
113 consistent with the idea that these are organs for the secretion of the “hatching  
114 enzyme”. We show that during their high secretory activity the pleuropodia express  
115 genes for cuticle degrading chitinase and proteases that were previously identified  
116 in the MF. This supports the “hatching enzyme hypothesis” (Slifer, 1937; 1938).

117

## 118 **RESULTS**

119

### 120 **Development of pleuropodia in the course of *Schistocerca* embryogenesis**

121

122 Before we could start exploring the genes expressed in the pleuropodia of  
123 *Schistocerca* we needed to understand how these organs develop in the locust, when  
124 they are fully differentiated and show activity. Cytological study of developing  
125 pleuropodia in grasshopper embryos was previously carried out by Slifer (Slifer,  
126 1938), but the light microscopy that she used does not provide sufficient resolution  
127 to distinguish the fine ultrastructure of the cells. Ultrastructure of pleuropodia by  
128 TEM has been described for several insects (Bullière, 1970; Louvet, 1973; Louvet,  
129 1975; Stay, 1977; Louvet, 1983; Rost et al., 2004; Viscuso and Sottile, 2008), but a  
130 chronological study is missing for *Schistocerca* or any other orthopteran.

131

132 Under our conditions *Schistocerca* embryogenesis lasts 14.5 days (100%  
133 developmental time, DT) (Figure 2A, S1). We followed the development of the

134 pleuropodia from the age of 4 days (27.6 % DT), when all appendages are similar  
135 looking short buds, until just before hatching, day 14 (Figures 2B, S2-S3).  
136 Simultaneously, we followed the development of the hind leg, which we used for  
137 comparison (because pleuropodia are peculiarly modified legs).  
138  
139 We traced cell divisions in the pleuropodia by using Phosphohistone- 3 as a marker  
140 (Figure 2C). The glandular cells were labeled only in the days 4 and 5. From day 6  
141 onwards no cell divisions were detected and the nuclei started to enlarge as the cells  
142 became polyploid (Grellet, 1971). The pleuropodial stalk cells, haemocytes entering  
143 the pluropodia and cells in the other embryonic tissues kept dividing.  
144  
145 Although the pleuropodia get their final external mushroom-like shape just before  
146 the embryos undergo katatrepsis (day 6; 41.4% DT) (Figure 2A,B), we found by TEM  
147 (Figure 3) that the glandular cells fully differentiate only later, shortly before dorsal  
148 closure (day 8; 55.2% DT) (compare the undifferentiated cells in Figure 3F-I, with  
149 differentiated cells in Figure 3J-P). At that time these cells form a single-layered  
150 transporting-like epithelium (Berridge and Oschman, 1972) and secretion granules  
151 inside and outside the cells become visible (Figure 3A-E, J). The granules outside of  
152 the cells first appear at the base and in between the long apical microvilli (brush-  
153 border) (Figure 3E,J). The whole pleuropodium is covered with a thin embryonic  
154 cuticle (“the first embryonic cuticle”, EC1); the tips of the microvilli produce fibrous  
155 material that is a part of this cuticle (Figure 3E) (compare with similar fibers above  
156 the leg epidermis in Figure S4).



157

158 As development progresses the secretion granules (inside and outside the cells)  
159 become more abundant and are present also above the microvilli (Figure 3K-P). On  
160 day 12 the apical side of the glandular cells changes: clusters of microvilli (usually at  
161 the borders between cells) elevate (Figure 3N). Later the cells show signs of  
162 degeneration, the chromatin condenses and the cell content becomes disorganized  
163 (Figure 3O,P). Large secretion granules are still abundant and probably released  
164 even on the last day before hatching, when the pleuropodia have shrunk and  
165 collapsed (Figures 2B,3P).

166

167 When the embryo moults (apolyse a cuticle and secretes a new one), first at about  
168 8.5 days and again just before 12 days (Figures 2A, S4), ecdysial droplets are present  
169 below the apolysed cuticle. These droplets are very similar at both moults (compare  
170 Figures S4F and I). They are very similar, but not identical to the granules released  
171 by the pleuropodia (Figure 4A,B). The glandular cells of the pleuropodia do not  
172 moult and keep the first embryonic cuticle (EC1) their whole life-time.

173

174 At hatching, the larva enclosed in the (now apolysed) second embryonic cuticle  
175 (EC2) leaves the eggshell and digs through the substrate up to the surface (Bernays,  
176 1971; Konopova and Zrzavy, 2005). Here the EC2 is shed and the degenerated  
177 pleuropodia are removed with it (Roonwall, 1937; Figure 2A).

178

179 Therefore our observations show that the timing of the high secretory activity  
180 corresponds to the stages when Slifer (Slifer, 1937) demonstrated the presence of  
181 the “hatching enzyme” (Figure 2A). Next we looked at what genes are expressed in  
182 the pleuropodia at this time.

183

184 **Generation of a comparative RNA-seq dataset from developing pleuropodia**  
185 **and legs of *Schistocerca***

186

187 To find out what genes are upregulated in the pleuropodia of *Schistocerca*, we  
188 applied a comparative genome wide expression analysis using RNA-seq. We  
189 generated a comprehensive embryonic transcriptome (see details in Materials and  
190 Methods) that served as reference for the analysis. This transcriptome consists of  
191 20834 transcripts (Table S1). Its completeness was assessed using the open-source  
192 software BUSCO (version 3) (Simão et al., 2015; Waterhouse et al., 2018). 95.6%,  
193 96.3% and 94.6% of the Metazoa, Arthropoda and Insecta orthologs, respectively,  
194 were found, a level comparable to published “complete” transcriptomes.

195

196 To gain insights into the gene expression dynamics of pleuropodia development, we  
197 dissected pleuropodia from ten embryonic stages and isolated their mRNAs. In  
198 parallel, we dissected hind legs for the same ten stages to generate a comparative  
199 transcriptomic dataset. In total we sequenced pairs of samples (pleuropodia and  
200 legs) from ten developmental stages and performed a differential expression  
201 analysis between legs and pleuropodia for each stage (Figure 2A, Table S2). A

202 principal component analysis (PCA) confirmed that legs and pleuropodia are not  
203 only morphologically very similar at early stages, but share a common  
204 transcriptomic landscape as well (Figure 5A). The number of differentially  
205 expressed genes (DEGs) rises as development progresses (Figure 5B, Table S3).  
206  
207 For several genes whose expression dynamics in the pleuropodia were already  
208 known, such as *Ubx*, *abd-A*, *dll* and *dac* (e.g., Tear et al., 1990; Bennett et al., 1999;  
209 Prpic et al., 2001; Hughes and Kaufman, 2002; Angelini et al., 2005; Zhang et al.,  
210 2005), we confirmed that they were up- or downregulated in our RNA-seq data as  
211 predicted (Table S4). To further validate the RNA-seq dataset, we carried out real-  
212 time RT-PCR on 46 selected genes in several stages (in total in 176 cases) and got  
213 results consistent with the sequencing data (Table S5). Therefore we are confident  
214 that we can identify important factors that are relevant for pleuropodia function and  
215 development.

216

### 217 **Identification of genes upregulated in the intensively secreting pleuropodia**

218

219 Since we wanted to focus specifically on the pleuropodia with high secretory activity  
220 we pooled the data from the samples 10, 11 and 12 days together, separately for  
221 pleuropodia and legs, and treated them as triplicates. These three samples cover the  
222 stages from the embryos after the dorsal closure, when the pleuropodia intensively  
223 release secretion granules, but are not in advanced state of degeneration (day 13)  
224 (Figures 2A, 3L-N). We performed differential expression analysis and gene

225 ontology (GO) enrichment analysis with genes upregulated in legs and pleuropodia.  
226 We identified 781 transcripts upregulated in the pleuropodia (compared to the legs)  
227 and 1535 downregulated (Table S3). Table 1 shows the top ten percent of the most  
228 highly abundant transcripts (measured in RPKM units, “reads per kilobase of  
229 transcript per million reads mapped”) that we found upregulated in the  
230 pleuropodia.

231

232 For the sake of clarity we summarized redundant GO terms in representative GO-  
233 groups (Figure 6; the full set of enriched GO terms are presented in Tables S6, S7;  
234 GOs enriched at each developmental stage separately are in Tables S8, S9). Our  
235 results show that the genes downregulated in the pleuropodia (upregulated in the  
236 legs) are enriched in GO terms associated with development and function of muscle  
237 tissue, cell division and DNA synthesis. This is in agreement with our and previous  
238 observations that the pleuropodia lack muscles, while at these stages the legs are  
239 differentiating, developing muscles and their cells are still dividing (Figure 2C). The  
240 pleuropodia downregulate genes for the development of mesoderm, which is  
241 consistent with the morphological observation that they are formed by ectodermal  
242 cells (Figure 3A).

243

244 The upregulated genes are primarily enriched in GO terms (Figure 6, Table S7)  
245 associated with transport, thus genetically confirming the morphological  
246 observations that the pleuropodia are transporting organs. These include genes for  
247 transporters present in typical insect transporting epithelia (Chintapalli et al.,

248 2013), such as the energy providing V-ATPase and Na<sup>+</sup>, K<sup>+</sup> ATPase (Table S10). We  
249 found enriched GO terms linked with lysosome organization, consistent with the  
250 observation that the pleuropodia contain numerous lysosomes (Figure 3, Louvet  
251 1975). We also found a large cluster of GO terms associated with lipid metabolism,  
252 consistent with the abundant smooth endoplasmic reticulum in the cells. Therefore,  
253 the pool of genes expressed in the pleuropodia is in agreement with the morphology  
254 of the organs. Among the novel findings are upregulation of genes associated with  
255 immunity, as well as with carbohydrate derivative metabolism, aminoglycan  
256 catabolic process and proteolysis: these might contain genes for degradation of the  
257 SC. Next we looked at selected genes in a detail.

258

### 259 **Pleuropodia upregulate genes for cuticular chitin degrading enzymes**

260

261 Insect cuticle is digested by a cocktail of chitin and protein degrading enzymes  
262 (Reynolds and Samuels, 1996; Zhang et al., 2014). Cuticular chitin is hydrolyzed by a  
263 two-enzyme system composed of a  $\beta$ -N-acetyl-hexosaminidase (NAG) and a  
264 chitinase (CHT) (Zhu et al., 2016). Both types of enzymes, a NAG and a chitinase,  
265 have to be simultaneously present for efficient hydrolysis of chitin (Fukamizo and  
266 Kramer, 1985). Previous studies have shown that only particular NAGs and CHTs  
267 are capable of efficiently digesting the type of chitin present in the insect cuticle (see  
268 below).

269

270 Insect NAGs were classified into four major classes, of which chitinolytic activity was  
271 demonstrated for group I and II (Table 2) (Hogenkamp et al., 2008; Rong et al.,  
272 2013). Our transcriptome contains four NAG transcripts, each representing one  
273 group (Table 2, Figures 7A-D, S5A, S6A). All were upregulated in the pleuropodia.  
274 Among them the *Sg-nag2* for the chitinolytic NAG group II had the highest expression  
275 (among 46 most highly “expressed” genes, Table 1) and fold change between legs  
276 and pleuropodia. The abundance of transcripts for the chitinolytic NAGs starts to rise  
277 from day 6 (Figure 7A,B) when the glandular cells in the pleuropodia begin to  
278 differentiate morphologically (Figures 1, 3). The expression profile of *Sg-nag2*, that  
279 we have chosen for validation, was similar by RNA-seq and real-time RT-PCR  
280 (compare Figure 7B and B’).

281

282 To see if the pleuropodia are the major source of the *Sg-nag2* transcript in the  
283 embryo, we looked at its expression in various parts of the body (head, thorax,  
284 abdomen with pleuropodia, abdomen from which pleuropodia were removed) using  
285 real-time RT-PCR (Figure 8A,B). We performed this analysis in embryos on day 6,  
286 when the pleuropodia are still immature, day 8, just at the onset of the secretory  
287 activity, day 10 and day 12 during active secretion. During all of the stages the  
288 abdomen with pleuropodia had the highest expression (A+ in Figure 8B), although  
289 the expression was lower in the youngest sample (day 6) compared to the samples  
290 from older embryos (day 8, 10 and 12). This shows that the pleuropodia are the  
291 major source of mRNAs for this cuticle-degrading NAG.

292

293 The insect CHTs have been classified into several groups (Zhu et al., 2016; Noh et al.,  
294 2018), of which the major role in the digestion of cuticular chitin is played by  
295 Chitinase 5 and (perhaps with a secondary importance) by Chitinase 10 (Zhu et al.,  
296 2008; Qu et al. 2014) (Table 2; the classification of CHTs into five major groups that  
297 we use here is based on Zhu et al., 2008). Some chitinases, for example, are  
298 expressed in the gut, trachea and fat body, where they are likely involved in  
299 digestion of dietary chitin, turnover of peritrophic matrix and immunity, other  
300 chitinases expressed by the epidermis organize assembly of the new cuticle (e.g.,  
301 Yan et al., 2002; Shi and Paskewitz, 2004; Pesch et al., 2016; Noh et al., 2018).

302

303 Our transcriptome contains 16 full or partial transcripts of CHTs representing all of  
304 the major CHT groups (Table 2, Figure S5B, S6B). The pleuropodia specifically  
305 upregulate both of the genes for Chitinase 5, homologs of *cht5-1* and *cht5-2* from the  
306 locust *Locusta migratoria* (Li et al., 2015). One of the transcripts, *Sg-cht5-1*, was  
307 among the top 15 most abundant transcripts upregulated in the highly secreting  
308 pleuropodia (Table 1). The predicted amino acid sequence contains a conserved  
309 catalytic domain and a signal peptide, and thus is likely to be active and secreted,  
310 respectively (Figure S5B). The other upregulated CHTs were homologs of *cht2* and  
311 *idgf*. By contrast, the *Schistocerca* homolog of *cht10* that also has a role in cuticular  
312 chitin hydrolysis and required for larval moulting (Zhu et al., 2008; Pesch et al.,  
313 2016) had low expression in both legs and pleuropodia.

314

315 We next focused on the transcript of the major chitinase, *Sg-cht5-1*. Unlike the NAGs,  
316 both RNA-seq and real-time RT-PCR have shown that the expression of this CHT is  
317 low in the early secreting stages, rises only later around day 12 and reaches highest  
318 levels when the pleuropodia are already degenerating (day 13 and 14) (Figure 7  
319 F,G,F'). Also real-time RT-PCR on cut embryos has shown that the pleuropodia are a  
320 major source of the *Sg-cht5-1* mRNA on day 12 but not before (the high expression  
321 in the whole embryo on day 10 could be linked to the second embryonic moult and  
322 was also observed with *Sg-cht7*, although not with *Sg-cht10*, Figure S8). These data  
323 show that the pleuropodia before hatching express a cuticle-degrading chitinase.

324

325 **Pleuropodia upregulate transcripts for some proteases that could digest a**

326 **cuticle**

327

328 Our GO enrichment analysis has shown that the secreting pleuropodia are enriched  
329 in transcripts for genes associated with proteolysis (Figure 6, Table S11).

330 Transcripts for proteases and their inhibitors are abundant among the top ten  
331 percent of the most highly “expressed” upregulated DEGs (Table 1). To see if the  
332 upregulated transcripts encode enzymes that are associated with digestion of insect  
333 cuticle, we compared our data with the enzymes identified in the complete  
334 proteomic analysis of the MF from the lepidopteran *Bombyx mori* (Zhang et al.,  
335 2014; Liu et al., 2018). Out of 69 genes that we searched, we found homologs or very  
336 similar genes in *Schistocerca* transcriptome for half of them (35). This made in total  
337 75 transcripts, of which 27 were upregulated (seven among the top ten percent



338 most highly expressed) and 15 downregulated (Tables 3, S12). The prominent MF  
339 protease Carboxypeptidase A (Sui et al., 2009; Zhang et al., 2014) and the Trypsin-  
340 like serine protease known to function in locust moulting (Wei et al., 2007) were not  
341 upregulated in the pleuropodia. These data indicate that the pleuropodia upregulate  
342 transcripts for proteolytic enzymes associated with the degradation of the cuticle  
343 and would be able to contribute to the digestion the SC, although the enzymatic  
344 cocktail produced by the pleuropodia may not be identical with the MF.

345

### 346 **Pleuropodia are enriched in transcripts for immunity-related proteins**

347

348 An observation that was not anticipated was the upregulation of genes for proteins  
349 involved in immunity (Lemaitre and Hoffmann, 2007; Buchon et al., 2014) (Figures  
350 6, 9, Table S13). This is especially interesting, because immunity related proteins  
351 have been found in the MF (Zhang et al., 2014). This is in agreement with that the  
352 cells in the pleuropodia are a type of barrier epithelium (Lemaitre and Hoffmann,  
353 2007; Buchon et al., 2014; Bergman et al., 2017), which enables the contact between  
354 the organism and its environment. Barrier epithelia (e.g., the gut, Malpighian tubules  
355 or tracheae) constitutively express genes for immune defense.

356

357 In total we found upregulated 99 transcripts (13 percent of the upregulated genes)  
358 for immunity-related proteins. These include proteins at all three levels, the  
359 pathogen recognition, signaling and response (Figure 9, Table S13). From the four  
360 signaling pathways, Toll was upregulated, but not IMD or JAK/STAT, and from the

361 JNK signaling we found c-Jun. Genes for a range of immune responses were  
362 upregulated, including production of reactive nitrogen species (RNS), melanization,  
363 genes for lysozymes and one antimicrobial peptide (AMP) similar to Dipteracin.  
364  
365 The transcripts for lysozymes were among the most highly expressed (Table 1) and  
366 we chose to focus on them. Lysozymes are secreted proteins that kill bacteria by  
367 breaking down their cell wall. Our *Schistocerca* transcriptome contains nine genes  
368 for lysozymes, seven of which were upregulated (Table 4, Table S14). The second  
369 most highly expressed DEG was a transcript for a C-type lysozyme (*Sg-LyzC-1*) that  
370 was previously shown to have anti-bacterial properties in *Schistocerca* (Mohamed et  
371 al., 2016) (Table 1). We examined expression of five selected genes on cut embryos  
372 by real-time RT-PCR (Figure 9). Our data showed that the pleuropodia are the major  
373 source of mRNAs for these genes.

374

### 375 **Pleuropodia do not upregulate the pathway for ecdysone biosynthesis**

376

377 Previous work has suggested that pleuropodia may be embryonic organs producing  
378 the moulting hormone ecdysone (Novak and Zambre, 1974). During post-embryonic  
379 stages, ecdysone is synthesized in the prothoracic glands and several other tissues  
380 by a common set of enzymes (reviewed in Niwa and Niwa 2014; Ou et al., 2016),  
381 some which have been characterized in the locusts (Marchal et al., 2011, 2012;  
382 Lenaerts et al., 2016; Sugahara et al., 2017). As shown in *Drosophila*, these genes are  
383 expressed in diverse cell types in embryos, and when the larval prothoracic glands

384 are formed their expression co-localizes there (Chávez et al., 2000; Warren et al.,  
385 2002; Petryk et al., 2003; Niwa et al., 2004; Warren et al., 2004).

386

387 Out of the nine genes critical for ecdysone biosynthesis, only one (*dib*) was  
388 upregulated in the highly secreting pleuropodia (Table 5, S15). One gene (*spo*) was  
389 downregulated. The pleuropodia are not enriched in the whole pathway at any time  
390 of development, including around katatrepsis, in which experiments supporting the  
391 synthesis of moulting hormone were carried out (Table S9, S16). Under the GO term  
392 “hormone biosynthetic process” enriched in the highly secreting pleuropodia (Table  
393 S7, S17) we found a gene *Npc2a* that encodes a transporter of sterols including  
394 precursors of ecdysone. It is also required for ecdysone biosynthesis, but indirectly  
395 and in the cells it functions as a general regulator of sterol homeostasis (Huang et al.,  
396 2007). We conclude that our transcriptomic data provide little evidence that the  
397 pleuropodia are involved in ecdysone biosynthesis.

398

## 399 **DISCUSSION**

400

### 401 **Pleuropodia of *Schistocerca* express genes for the “hatching enzyme”**

402

403 The first demonstration of the physiological role of the pleuropodia comes from the  
404 experiments carried out on a grasshopper *Melanoplus* (closely related to  
405 *Schistocerca*), by Eleanor Slifer (Slifer, 1937). When she took embryos before  
406 hatching (Figure 2) and separated anterior and posterior halves by ligation, the SC

407 was digested only in the part of the egg with the pleuropodia. Surgical removal of  
408 the pleuropodia prevented SC digestion in the whole egg. Slifer's hypothesis that the  
409 pleuropodia secrete the "hatching enzyme" was criticized by Novak and Zambre  
410 (1974): if the deposition and digestion of the SC is similar to the cuticle turnover  
411 during larval moulting, then the "hatching enzyme" is produced by the serosa. They  
412 believed that the pleuropodia reach the peak of their activity in embryos during  
413 katatrepsis (45% DT) and participate in digestion of the SC indirectly by secreting  
414 ecdysone to stimulate the serosa.

415

416 Our ultrastructural observations on staged pleuropodia of *Schistocerca* have shown  
417 that the glandular cells only begin to differentiate just at the time of katatrepsis  
418 (45% DT) and do not secrete at that time. This would explain why no digestive effect  
419 on the SC was detected by Novak and Zambre (Novak and Zambre, 1974) using a  
420 homogenate from *Schistocerca* pleuropodia isolated at this stage. The release of  
421 granular secretion starts just before dorsal closure (55% DT) and intensifies before  
422 hatching. This is in agreement with previous observations on some stages of the  
423 pleuropodia in other orthopterans (Louvet, 1975; Viscuso and Sottile, 2008).

424

425 Our RNA-seq analysis revealed that the secreting pleuropodia highly express genes  
426 encoding enzymes that are capable of digesting a typical chitin-protein insect  
427 cuticle. These include genes for proteolytic enzymes similar to those present in the  
428 MF and cuticular chitin-degrading NAGs and Chitinase 5. The pleuropodia also  
429 express genes for Chitinase 2 and Idgf, which have low effect on cuticular chitin

430 digestion, but were shown to organize proteins and chitin fibres during cuticle  
431 deposition (Pesch et al., 2016). These CHTs may organize the fibres in the cuticle  
432 secreted by the pleuropodia (Figure 3).

433

434 In combination with RT-PCR we showed that, while the expression of the *Sg-nag1*  
435 and *Sg-nag2* started to rise in parallel with the differentiation of the glandular cells,  
436 the *Sg-cht5-1* and *Sg-cht5-2* transcripts raised shortly before hatching. Chitinase 5 is  
437 a critical chitin-degrading chitinase in insects: it is highly abundant in the moulting  
438 fluid and its silencing in diverse insects including locusts leads to failure in larval  
439 moulting (Zhu et al., 2008; Zhang et al., 2014; Li et al., 2015; Xi et al., 2015; Pesch et  
440 al., 2016). Our data indicate that the sudden rise in the expression of *Sg-cht5* in the  
441 pleuropodia at the end of embryogenesis and presumably secretion of this CHT into  
442 the extraembryonic space is the key component of the “hatching enzyme” effect  
443 (Slifer 1937; 1938) in locusts and grasshoppers.

444

445 **Pleuropodia in some other insects could secrete the “hatching enzyme” and**  
446 **their function may also vary among species**

447

448 There is evidence to suggest that the process occurs similarly in some insect. As in  
449 orthopterans, the pleuropodia of the rhagophthalmid beetle *Rhagophthalmus ohbai*  
450 release secretion after katatrepsis and SC rapidly degrades just shortly before  
451 hatching (Kobayashi et al., 2003). In the large water true bugs from the family  
452 Belostomatidae, the male carries a batch of eggs on his back. It is believed that the

453 detachment of the eggs just before hatching is also caused by the secretion from the  
454 pleuropodia (Tanizawa et al., 2007).

455

456 The molecular mechanism of SC degradation may also vary between insects and as  
457 previously hypothesized (Novak and Zambre, 1974) the serosa may also contribute  
458 to the SC degradation. The serosa of the beetle *Tribolium*, expresses *cht10* and *cht7*  
459 (Jacobs et al., 2015), of which the former CHT is important for cuticular chitin  
460 digestion. Silencing of *cht10*, but not *cht5* prevented larvae from hatching (Zhu et al.,  
461 2008). Transcripts for *cht10* were not upregulated in the pleuropodia of  
462 *Schistocerca*. This suggests that the SC is degraded by enzymes produced by both,  
463 the serosa and the pleuropodia and that the indispensable roles in cuticle digestion  
464 are played by different enzymes in different insects.

465

466 In some insects the pleuropodia may not be involved in hatching but have another  
467 function. In the viviparous cockroach *Diploptera punctata* (Stay, 1977), the secretion  
468 from the pleuropodia is very low and the large pleuropodia of the melolonthid  
469 beetle *Rhizotrogus majalis* have not been observed to produce any secretion  
470 granules at all (Louvet, 1983). In dragonflies, one of the more basal lineages of  
471 insects, the secretion likely has a different function than in orthopterans, because  
472 their SC is not digested before hatching (Ando, 1962). The special epithelium in the  
473 pleuropodia shares features with transporting epithelia (Louvet, 1973; Stay, 1977)  
474 that function in water transport and ion balance (Berridge and Oschman, 1972). Our  
475 data do not exclude this function, but it is yet to be tested.

476

477 **The pleuropodia of *Schistocerca* are enriched in transcripts for enzymes**

478 **functioning in immunity**

479

480 We found that many of the genes expressed in the pleuropodia encode proteins  
481 involved in immunity (Lemaitre and Hoffmann, 2007). This indicates that the  
482 pleuropodia are also organs of epithelial immunity, similar to other barrier epithelia  
483 in postembryonic stages (such as the gut) (Bergman et al., 2017), which are in a  
484 constant contact with microorganisms. The pleuropodia differ from such tissues in  
485 that they are not directly exposed to the environment, but enclosed in the eggshell,  
486 seemingly limiting their contact with microorganisms. Proteins associated with  
487 immune defense are also found in the MF (Zhang et al., 2014), where they prevent  
488 invasion of pathogens through a “naked” epidermis after the separation of the old  
489 cuticle from the epidermis in the process of apolysis. As found in the beetle  
490 *Tribolium*, during the early embryonic stages the frontier epithelium providing the  
491 egg with an immune defense is the extraembryonic serosa (Jacobs et al., 2014). The  
492 serosa starts to degenerate after katrepsis and disappears at dorsal closure  
493 (Panfilio, 2008). The pleuropodia of *Schistocerca* differentiate just before dorsal  
494 closure, suggesting that they take over this defense function in late embryogenesis.  
495 It will be interesting to clarify in the upcoming research whether apart from their  
496 role in hatching the pleuropodia are important organs for fighting against potential  
497 pathogens that have gained access to the space between the embryo and the  
498 eggshell.

499

## 500 **Conclusions**

501

502 The pleuropodia of *Schistocerca* have morphological markers of high secretory  
503 activity in the second half of embryogenesis after the definitive dorsal closure is  
504 finished. Transcriptomic profiling indicate that the conclusions that Eleanor Slifer  
505 drew from her experiments over eighty years ago that the pleuropodia secrete  
506 cuticle degrading enzymes, were correct. The pleuropodia likely have other  
507 functions, such as in immunity. The pleuropodia are specialized embryonic organs  
508 and apparently an important though neglected part of insect physiology.

509

## 510 **MATERIALS AND METHODS**

511

### 512 **Insects**

513

514 *Schistocerca gregaria* (gregarious phase) were obtained from a long-term, partly  
515 inbred colony at the Department of Zoology, University of Cambridge. Eggs were  
516 collected into aluminium pots filled with damp sand. The pots were picked up after  
517 two (most samples) or four hours and incubated at 30°C.

518

### 519 **Description of embryonic stages**

520



521 Embryos and appendages were dissected in phosphate buffer saline (PBS). Whole  
522 eggs were bleached in 50% household bleach to dissolve the chorion. All were  
523 photographed in water or PBS using the Leica M125 stereomicroscope equipped  
524 with DFC495 camera and associated software. Photos were processed using Adobe  
525 Photoshop CC 2017.1.1. Photos of eggs and embryos that illustrate the stage (Figure  
526 2A and S1) had the background cleaned using the software (removal of the tools  
527 that hold the photographed objects in place).

528

### 529 **Immunohistochemistry on paraffin sections**

530

531 Embryos were dissected in PBS and pieces including posterior thorax and anterior  
532 abdomen (older embryos) or mid thorax plus whole abdomen (young embryos)  
533 were fixed in PEMFA (4% formaldehyde in PEM buffer: 100 mM PIPES, 2.0 mM  
534 EGTA, 1.0 mM MgSO<sub>4</sub>) at room temperature (RT) for 15-30 minutes, then washed in  
535 PBT (PBS with 0.1% Triton-X 100) and stored in ethanol at -20°C.

536 Samples were cleared in 3x10 minutes in HistoSol (National Diagnostics) at RT,  
537 infiltrated with paraffin at 60°C for 2-3 days, embedded in moulds and hardened at  
538 RT. Sections 6-8 µm thick were prepared on a Leica RM2125RTF microtome. The  
539 slides with sections were washed with HistoSol, ethanol, then stepwise re-hydrated  
540 to PBT. Incubations were carried out in a humidified chamber. Slides were blocked  
541 with 10% sheep serum (Sigma-Aldrich) in PBT for 30 minutes at RT, incubated with  
542 Phospho-Histone H3 antibody (Invitrogen) diluted with PBT 1:130 at 4°C overnight,  
543 washed and incubated with Alexa Fluor 568 anti-rabbit secondary antibody

544 (Invitrogen) diluted 1:300 at RT for 2 hours, washed and incubated with DAPI  
545 (Invitrogen) diluted 1:1000. Sections were imaged with a Leica TCS SP5 confocal  
546 microscope and photos processed using Fiji (<https://fiji.sc>).

547

## 548 **Electron microscopy**

549

550 For TEM embryos were removed from the chorion in PBS and pieces of posterior  
551 thorax to anterior abdomen were fixed in 2.5-3.0% glutaraldehyde in 0.1 M  
552 phosphate buffer pH7.2 for a few hours at room temperature and then at 4°C for  
553 several days. Each pleuropodium and leg were then separated and embedded into  
554 2% agar. Small cubes of agar with the tissue were incubated in osmium ferrocyanide  
555 solution (3% potassium ferricyanide in cacodylate buffer with 4 mM calcium  
556 chloride) for 1-2 days at 4°C, then in thiocarbohydrazide solution (0.1 mg  
557 thiocarbohydrazide from Sigma-Aldrich, and 10 ml deionized water dissolved at  
558 60°C) and protected from light for 20-30 minutes at RT, then in 2% aqueous  
559 osmium tetroxide 30-45 minutes at RT and in 1% uranyl acetate (maleate buffered  
560 to pH 5.5) at 4°C overnight. Washing between each step was done with deionized  
561 water. Samples were dehydrated in ethanol, washed with dry acetone, dry  
562 acetonitrile, infiltrated with Quetol 651 resin (Agar Scientific) for 4-6 days and  
563 hardened in moulds at 60°C for 2-3 days. Semithin sections were stained with  
564 toluidine blue. Ultrathin sections were examined in the Tecnai G280 microscope.

565

566 For SEM whole embryos were dissected out of the chorion in PBS, fixed in 3%  
567 glutaraldehyde in phosphate buffer similarly as above. They were post-fixed with  
568 osmium tetroxide, dehydrated through the ethanol series, critical point dried, gold  
569 coated, and observed in a FEI/Philips XL30 FEGSEM microscope. Photos from TEM  
570 and SEM were processed using Adobe Photoshop CC 2017.1.1.

571

### 572 **Preparation of the reference transcriptome**

573

574 Whole embryo transcriptome: Eggs from each 1-day egg collection incubated for the  
575 desired time were briefly treated with 50% bleach, washed in distilled water and  
576 frozen in liquid nitrogen. Total RNA was isolated with TRIzol reagent (Invitrogen),  
577 treated with TURBO DNase (Invitrogen) and purified on a column supplied with the  
578 RNeasy Kit (Quiagen). The purified RNA from each day (14 samples) was pooled  
579 into 4 samples: day 1-4, 5-7, 8-10 and 11-14. Ten µg of RNA from each of the 4  
580 samples was sent to BGI (Hong Kong). The total RNA was enriched in mRNA by  
581 using the oligo(dT) magnetic beads and cDNA library was prepared. 100 bp paired-  
582 end (PE) reads were sequenced on Illumina HiSeq 2000; numbers of the reads  
583 obtained are in Table S2. Non-clean reads were filtered using filter\_fq software  
584 (removes reads with adaptors, reads with unknown nucleotides larger than 5% and  
585 low quality reads). Transcripts from all samples were assembled separately using  
586 the Trinity software (release 20130225) (Grabherr et al., 2011) with parameters: --  
587 seqType fq --min\_contig\_length 100; --min\_glue 4 --group\_pairs\_distance 250; --  
588 path\_reinforcement\_distance 95 --min\_kmer\_cov 4. Transcripts from the 4

589 assemblies were then merged together to form a single set of non-redundant  
590 transcripts using TGICL software (v2.1) (Pertea, 2003) with parameters: -l 40 -c 10 -  
591 v 20.

592

593 Legs and pleuropodia transcriptome (age about 8.5-8.75 days): The appendages  
594 were dissected in cold RNase-free PBS (treated with diethyl pyrocarbonate) and  
595 total RNA was isolated and cleaned as described above. Ten µg of RNA from each leg  
596 sample and pleuropodium sample were transported to the Eastern Sequence and  
597 Informatics Hub (EASIH), Cambridge (UK). cDNA libraries were prepared including  
598 mRNA enrichment. 75 bp PE reads were sequenced on Illumina GAIIIX; numbers of  
599 the reads obtained are in Table S2. The reads were trimmed to the longest  
600 contiguous read segment for which the quality score at each base is greater than a  
601 Phred quality score of Q = 13 (or 0.05 probability of error) using the program  
602 DynamicTrim (v. 1.7) from the package SolexQA (Cox et al., 2010;  
603 <http://solexaqa.sourceforge.net/>). The trimmed reads were then filtered to remove  
604 sequence adapter using the program cutadapt (v. 0.9;  
605 <http://code.google.com/p/cutadapt/>). Sequences shorter than 40 bp were  
606 discarded. Trimmed reads were used to de novo assemble the transcriptome using  
607 Velvet (v. 1.1.07; Zerbino et al., 2008; <http://www.ebi.ac.uk/~zerbino/velvet/>)  
608 (commands: -shortPaired -fastq; -short2 -fastq; -read\_trkg yes) and Oases (v.  
609 0.2.01; Schulz et al., 2012; <http://www.ebi.ac.uk/~zerbino/oases/>) (commands: -  
610 ins\_length 350). Velvet is primarily used for de-novo genome assembly; here, the  
611 contigs that were output by Velvet were used by the complementary software

612 package Oases to build likely transcripts from the RNA-seq dataset. K-mer sizes of  
613 21, 25 and 31 were attempted for the two separate samples as well as the combined  
614 samples and optimal K-mer sizes of 21 were found for both samples.

615

616 Transcripts for the reference transcriptome were selected from the embryonic and  
617 legs and pleuropodia transcriptomes. The transcripts were first merged with  
618 evigene (version 2013.03.11) using default parameters. Because this selection of  
619 transcripts eliminated some genes (gene represented by zero transcripts, although  
620 the transcripts were present in the original transcriptomes), we repeated the step  
621 with less strict parameters (cd-hit-est - version 4.6, with -c 0.80 -n 5). This second  
622 selection contained several genes represented by more transcripts, therefore we  
623 aligned selection 1 and 2 to each other to identify, which genes in selection 1 were  
624 missing. Selection 1 was then completed with the help of selection 2 by adding the  
625 missing transcripts. The quality and completeness of the resulting transcriptome  
626 was assessed and edited in the following steps. First, we removed several redundant  
627 transcripts manually: these were found by blasting diverse insect sequences  
628 (queries) against the *Schistocerca* transcriptome using the local ViroBLAST interface  
629 (Deng et al., 2007). Some transcripts were edited manually, such as when we found  
630 that two transcripts were combined into one, resulting in an alignment against two  
631 protein sequences (*Schistocerca* transcript blasted against NCBI GenBank database)  
632 we split the respective transcripts. Second, we blasted the whole transcriptome  
633 against itself and removed redundant sequences, if the alignment was spanning at  
634 least 300 bp with a sequence identity of at least 98% (Blast+ suite, version 2.6.0).

635 The longer transcript was kept in all cases. Transcripts shorter than 200 bp were  
636 discarded. All these steps were carried out in R (R Development Core Team, 2008;  
637 <http://www.R-project.org>) and sequences were handled using the Biostrings  
638 package (Pagès et al., 2017).

639

#### 640 **Sequence analysis**

641

642 Basic transcript analysis was done by CLC Sequence Viewer7 (QIAGEN). Signal  
643 peptide and transmembrane regions were predicted by Phobius (Käll et al., 2007;  
644 <http://phobius.binf.ku.dk/index.html>). Conserved domains were identified using  
645 SMART (<http://smart.embl-heidelberg.de/>). To annotate the newly assembled  
646 transcriptome, the freely available annotation pipeline Trinotate (version 3.1.1) was  
647 used (Haas et al., 2013). The longest candidate ORF of each sequence was identified  
648 with the help of the inbuilt TransDecoder (Haas et al., 2013;  
649 <https://github.com/TransDecoder/TransDecoder/wiki>) software.

650

651 A blast was run against Uniprot sequences specific for *Schistocerca gregaria*, *Locusta*  
652 *migratoria*, *Apis mellifera*, *Tribolium castaneum*, *Bombyx mori* and *Drosophila*  
653 *melanogaster* (blastx with default parameter and -max\_target\_seqs 1).

654

#### 655 **RNA-seq expression analysis**

656

657 Pleuropodia and hind legs from embryos at the same age (day 4, 5, 6, 7, 8, 10, 11, 12  
658 and 13) were dissected in cold RNase-free PBS and total RNA was isolated as  
659 described for samples for the reference transcriptome, but cleaned with RNA Clean  
660 & Concentrator (Zymo Research). One  $\mu\text{g}$  of RNA from each sample was sent to BGI  
661 (Hong Kong). The mRNA enrichment and cDNAs preparation was as described  
662 above. 50 bp single-end (SE) reads were sequenced on Illumina HiSeq 2000. Over 45  
663 million reads were sequenced from each sample (Table S2).

664

665 A pair of samples from mixed embryos 8-9 days that was used for the preparation of  
666 the reference transcriptome (described above) was also included in the expression  
667 analysis, but prior to mapping, the 75 bp PE reads were trimmed to 50 bp, using  
668 Trimmomatic in the paired-end mode (version 0.36) using the CROP function  
669 (CROP:50). A single pleuropodium or leg sample was sequenced from each stage.

670

671 The quality of the sequenced reads was assessed using the FastQC software. All  
672 samples consistently showed a Per base sequence quality of  $> 30$ . Reads were  
673 mapped to the reference transcriptome with Bowtie2 (version 2.2.5) using default  
674 parameter and the `-local` alignment mode (Langmead et al., 2009). The trimmed  
675 pairs of reads were concatenated for each stage and treated as single reads. A PCA  
676 plot was generated to assess if differences in sequencing type and processing (SE  
677 samples and PE samples day 8-9) had an effect, which was not the case. This plot  
678 was prepared by using the `plotPCA()` function in the DESeq2 R package (Love et al.,  
679 2014); the count matrix was transformed with the `rlog()` function. The R package

680 HTSFilter (Rau et al., 2013) was used with default parameters to filter constantly  
681 low expressed genes and 12988 transcripts were left.  
682  
683 The differential expression analysis was performed with the NOISeq R package  
684 (2.22.1; Tarazona et al., 2011). Reads were first normalized using the RPKM method  
685 (Mortazavi et al., 2008). We used NOISeq-sim to find the differentially expressed  
686 genes between legs and pleuropodium for each stage with the following parameters:  
687  $k = \text{NULL}$ ,  $\text{norm} = \text{"n"}$ ,  $\text{pnr} = 0.2$ ,  $\text{nss} = 5$ ,  $v = 0.02$ ,  $\text{lc} = 1$ ,  $\text{replicates} = \text{"no"}$ , following the  
688 recommendations by the authors for simulation of “technical replicates” prior to  
689 differential expression analysis without replicates. Additionally differentially  
690 expressed genes between highly secreting pleuropodia and legs at the same stage  
691 were assessed (treating samples from day 10, 11 and 12 as replicates) using the  
692 NOISeq-real algorithm with the following parameters:  $k=0.5$ ,  $\text{norm} = \text{"n"}$ ,  
693  $\text{factor} = \text{"type"}$ ,  $\text{nss} = 0$ ,  $\text{lc} = 1$ ,  $\text{replicates} = \text{"technical"}$ . To define significantly  
694 differentially expressed genes, the probability (“prob”) threshold was set at 0.7 for  
695 single stage comparisons and 0.8 for the triplicated comparison,  $\text{RPKM} > 10$  and fold  
696 change  $> 2$  for both single stage and triplicated comparisons (based on the  
697 expression of the genes whose expression dynamics in the pleuropodia were  
698 already known, Table S4).

699

## 700 **GO enrichment**

701



702 The transcriptome was blasted against the whole UniProt/Swiss-Prot database to  
703 assess the corresponding GO terms. Only blast hits with an e-value  $\leq 1e-5$  were  
704 considered for the subsequent GO annotation. GO enrichment of differentially  
705 expressed genes was performed using the R package Goseq (version 1:30.0, Young  
706 et al., 2010) implemented in the Trinotate pipeline (see above). Enriched GO terms  
707 were summarized and visualized with REVIGO (Supek et al., 2011). Dot plots were  
708 prepared from DEGs selected at thresholds: RPKM  $> 50$ , fold change  $> 3$ .

709

### 710 **Real-time RT-PCR**

711

712 Tissues were dissected, total RNA was isolated and DNase treated the same way as  
713 for sequencing and cleaned with RNA Clean & Concentrator (Zymo Research). cDNA  
714 was synthesized with oligo-dT primer (Invitrogen) and 0.5  $\mu\text{g}$  (legs, pleuropodia) or  
715 1  $\mu\text{g}$  (pieces of embryos) of the RNA using ThermoScript RT-PCR System  
716 (Invitrogen) at 55°C. The cDNA was diluted to concentration 40 ng/ $\mu\text{l}$  and 5  $\mu\text{l}$  was  
717 used in a reaction containing 10  $\mu\text{l}$  of SYBR Green PCR Master Mix (Applied  
718 Biosystems) and 5  $\mu\text{l}$  of a 1:1 mix of forward and reverse primers (each 20 nM in  
719 this mix). Reactions were run in the LightCycler480 (Roche)  
720 and analyzed using the associated software (release 1.5.0 SP1) according to the  
721 comparative Ct method and normalized to the *eEF1 $\alpha$*  gene. Primers (Table S18)  
722 were designed with Primer3PLUS program (Untergasser et al., 2007). To check for  
723 the presence of a single PCR product, the melting curve was examined after each run

724 and for each pair of primers at least 2 finished runs were visualized on a 2% agarose  
725 gel.

726

727 The program was: denaturation: 95°C for 10 minutes (1 cycle), amplification: 95°C  
728 for 10 seconds, 60°C for 15 seconds, 72°C for 12 seconds (40 cycles) melting: 95°C  
729 for 5 seconds, 60°C for 1 minute, 95°C.

730

### 731 **LIST OF ABBREVIATIONS**

732

733 A1: first abdominal segment; CHT: chitinase, DEG: differentially expressed gene; DT:  
734 developmental time; EC1, EC2, EC3: the first, the second, the third embryonic cuticle,  
735 respectively; GO: gene ontology; LEG: hind leg(s); MF: moulting fluid; NAG:  $\beta$ -N-  
736 acetyl-hexosaminidase; PCA: principal component analysis; PLP: pleuropodium  
737 (pleuropodia); RPKM: reads per kilobase of transcript per million reads mapped; SC:  
738 serosal cuticle; SEM: scanning electron microscopy; T3: third thoracic segment;  
739 TEM: transmission electron microscopy

740

### 741 **COMPETING INTERESTS**

742

743 The authors declare that they have no competing interests.

744

### 745 **FUNDING**

746

747 This work was supported by Human Frontier Science Program (Long-Term  
748 postdoctoral fellowship LT000733/2009-L), Biotechnology and Biological Sciences  
749 Research Council (grant number grant BB/ K009133/1), Isaac Newton Trust  
750 (University of Cambridge) and Balfour-Browne Fund (University of Cambridge).

751

## 752 **AUTHOR'S CONTRIBUTIONS**

753

754 BK initiated the study, designed research, carried out all experimental work,  
755 supervised the bioinformatics analysis, interpreted the data and wrote the paper;  
756 EB performed majority of the bioinformatics analysis and edited the draft; AC  
757 carried out the initial steps in the selections of transcripts for the reference  
758 transcriptome and did a preliminary expression analysis. All authors read and  
759 approved the manuscript.

760

## 761 **ACKNOWLEDGEMENTS**

762

763 Majority of the work was carried out in the lab of Michael Akam (University of  
764 Cambridge) and the data analysis was finished in the lab of Gregor Bucher  
765 (University of Göttingen); BK thanks to both for hosting and financial support.  
766 Electron microscopy was done at the Cambridge Advanced Imaging Centre  
767 (University of Cambridge). Immunolabeling was done in the lab and with help of  
768 Andrew Gillis. Stereomicroscopic pictures were taken in the lab of Paul Brakefield.  
769 We also thank for help and advice to Ken Siggins, Jenny Barna, Jeremy Skepper and

770 lab, Steven Van Belleghem, Barry Denholm, Jan Sobotnik, and Gareth Griffiths, for  
771 scripts to Erik Clark and Simon Martin. We thank to Michael Akam, Siegfried Roth,  
772 Stuart Reynolds, Nico Posnien and Maurijn van der Zee for comments on the  
773 manuscript.

774 **REFERENCES**

775

776 Ando H. 1962. The comparative embryology of Odonata with special reference to a  
777 relic dragonfly *Epiophlebia superstes* Selys. Sugadaira Biological Laboratory of  
778 Tokyo Kyoiku University.

779

780 Ando H, Haga K. 1974. Studies on the Pleuropodia of Embioptera, Thysanoptera, and  
781 Mecoptera. Tokyo U. Educ. Sugadaira Biol. Lab. Bull 6:1-8.

782

783 Angelini DR, Liu PZ, Hughes CL, Kaufman TC. 2005. Hox gene function and  
784 interaction in the milkweed bug *Oncopeltus fasciatus* (Hemiptera). *Dev Biol*  
785 287:440-455.

786

787 Bedford GO. 1978. The development of the egg of *Didymuria violescens*  
788 (Phasmatodea: Phasmatidae: Podacanthinae) – embryology and determination of  
789 the stage at which first diapause occurs. *Aust J Zool* 18:155-169.

790

791 Bennett RL, Brown SJ, Denell RE. 1999. Molecular and genetic analysis of the  
792 *Tribolium Ultrabithorax* ortholog, *Ultrathorax*. *Dev Genes Evol* 209:608-619.

793

794 Bergman P, Seyedoleslami Esfahani S, Engström Y. 2017. *Drosophila* as a Model for  
795 Human Diseases-Focus on Innate Immunity in Barrier Epithelia. *Curr Top Dev Biol*  
796 121:29-81.

797

798 Bernays EA. 1971. The vermiform larva of *Schistocerca gregaria* (Forskål): form and  
799 activity (Insecta, Orthoptera). *Z Morph Tiere* 70:183–200.

800

801 Berridge MJ, Oschman JL. 1972. Transporting epithelia. Academic Press, New York.

802

803 Buchon N, Silverman N, Cherry S. 2014. Immunity in *Drosophila melanogaster* –  
804 from microbial recognition to whole-organism physiology. *Nat Rev Immunol*  
805 14:796-810.

806

807 Bullière F. 1970. L'évolution des pleuropodes au cours du développement  
808 embryonnaire de la *Blabera craniifer* (Insecte Dictyoptère). *Arch Anat Microsc*  
809 59:201-220.

810

811 Chávez VM, Marqués G, Delbecque JP, Kobayashi K, Hollingsworth M, Burr J, Natzle  
812 JE, O'Connor MB. 2000. The *Drosophila* disembodied gene controls late embryonic  
813 morphogenesis and codes for a cytochrome P450 enzyme that regulates embryonic  
814 ecdysone levels. *Development* 127:4115-4126.

815

816 Chintapalli VR, Wang J, Herzyk P, Davies SA, Dow JA. 2013. Data-mining the FlyAtlas  
817 online resource to identify core functional motifs across transporting epithelia. *BMC*  
818 *Genomics* 14:518.

819

- 820 Cox MP, Peterson DA, Biggs PJ. 2010. SolexaQA: At-a-glance quality assessment of  
821 Illumina second-generation sequencing data. *BMC Bioinformatics* 11:485.  
822
- 823 Deng W, Nickle DC, Learn GH, Maust B, Mullins JI. 2007. ViroBLAST: a stand-alone  
824 BLAST web server for flexible queries of multiple databases and user's datasets.  
825 *Bioinformatics* 23:2334-2336.  
826
- 827 Fraulob M, Beutel RG, Machida R, Pohl H. 2015. The embryonic development of  
828 *Stylops ovinae* (Strepsiptera, Stylopidae) with emphasis on external morphology.  
829 *Arthropod Struct Dev* 44:42-68.  
830
- 831 Fukamizo T, Kramer KJ. 1985. Mechanism of chitin oligosaccharide hydrolysis by the  
832 binary enzyme chitinase system in insect moulting fluid. *Insect Biochem* 15:1-7.  
833
- 834 Goltsev Y, Rezende GL, Vranizan K, Lanzaro G, Valle D, Levine M. 2009.  
835 Developmental and evolutionary basis for drought tolerance of the *Anopheles*  
836 *gambiae* embryo. *Dev Biol* 330:462-470.  
837
- 838 Graber V. 1889. Ueber den Bau und die phylogenetische Bedeutung der  
839 embryonalen Bauchanhänge der Insekten. *Biol Zent Bl* 9:355-363.  
840
- 841 Grabherr MG, Haas BJ, Yassour M, Levin JZ, Thompson DA, Amit I, Adiconis X, Fan L,  
842 Raychowdhury R, Zeng Q, Chen Z, Mauceli E, Hacohen N, Gnirke A, Rhind N, di Palma

843 F, Birren BW, Nusbaum C, Lindblad-Toh K, Friedman N, Regev A. 2011. Full-length  
844 transcriptome assembly from RNA-Seq data without a reference genome. *Nat*  
845 *Biotechnol* 29:644-652.

846

847 Grellet P. 1971. Variations du volume et teneur en AND des noyaux de *Scapsipedus*  
848 *marginatus* Afz. et Br. (Orthoptère, Gryllidae) au cours de l'embryogenèse. *Wilhelm*  
849 *Roux Arch Entwickl Mech Mech Org*, 167:243-265.

850

851 Haas BJ, Papanicolaou A, Yassour M, Grabherr M, Blood PD, Bowden J, Couger MB,  
852 Eccles D, Li B, Lieber M, MacManes MD, Ott M, Orvis J, Pochet N, Strozzi F, Weeks N,  
853 Westerman R, William T, Dewey CN, Henschel R, LeDuc RD, Friedman N, Regev A.  
854 2013. De novo transcript sequence reconstruction from RNA-seq using the Trinity  
855 platform for reference generation and analysis. *Nat Protoc* 8:1494-1512.

856

857 Hagan HR. 1931. The embryogeny of the polychaete, *Hesperothenes fumarius*  
858 *Westwood*, with the reference to viviparity in insects. *J Morphol Physiol* 51:3-115.

859

860 Heming BS. 1993. Origin and fate of pleuropodia in embryos of *Neoheegeria*  
861 *verbasci* (Osborn) (Thysanoptera: Phlaeothripidae). In: Bhatti JS, editor. *Advances in*  
862 *Thysanopterology*. New Delhi: Scientia Publishing. *Journal of Pure and Applied*  
863 *Zoology* 4. p 205-223.

864



865 Hogenkamp DG, Arakane Y, Kramer KJ, Muthukrishnan S, Beeman RW. 2008.  
866 Characterisation and expression of  $\beta$ -N-acetylhexosaminidase gene family of  
867 *Tribolium castaneum*. *Insect Biochem Mol Biol* 38:478-489.  
868  
869 Huang X, Warren JT, Buchanan J, Gilbert LI, Scott MP. 2007. *Drosophila* Niemann-  
870 Pick type C-2 genes control sterol homeostasis and steroid biosynthesis: a model of  
871 human neurodegenerative disease. *Development* 134:3733-3742.  
872  
873 Hughes CL, Kaufman TC. 2002. Hox genes and the evolution of the arthropod body  
874 plan. *Evol Dev* 4:459-99.  
875  
876 Hussey PB. 1926. Studies on the Pleuropodia of *Belostoma Flumineum* Say and  
877 *Ranatra Fusca* Palisot de Beauvois, with a discussion of these organs in other insects.  
878 *Entomol Am* 7:1-82.  
879  
880 Jacobs CG, Spaink HP, van der Zee M. 2014. The extraembryonic serosa is a frontier  
881 epithelium providing the insect egg with a full-range innate immune response. *eLife*  
882 3:e04111.  
883  
884 Jacobs CGC, Braak N, Lamers GEM, van der Zee M. 2015. Elucidation of the serosal  
885 cuticle machinery in the beetle *Tribolium* by RNA sequencing and functional  
886 analysis of Knickkopf1, Retroactive and Laccase2. *Insect Biochem Mol Biol* 60:7-12.  
887

888 Jones B. 1956. Endocrine activity during insect embryogenesis. Control of events in  
889 development following the embryonic moult (*Locusta migratoria* and *Locustana*  
890 *pardalina*, Orthoptera). *J Exp Biol* 33:685-696.

891

892 Käll L, Krogh A and Sonnhammer ELL. 2007. Advantages of combined  
893 transmembrane topology and signal peptide prediction-the Phobius web server.  
894 *Nucleic Acids Res* 35:W429-432.

895

896 Kamiya A, Ando H. 1985. External morphogenesis of the embryo of *Ascalaphus*  
897 *ramburi* (Neuroptera, Ascalaphidae). In: *Recent Advances in Insect Embryology in*  
898 *Japan*. H Ando, K Miya, editors. (ISEBU Co. Ltd.), p 203-213.

899

900 Kjer KM, Simon C, Yavorskaya M, Beutel RG. 2016. Progress, pitfalls and parallel  
901 universes: a history of insect phylogenetics. *J R Soc Interface* 13:20160363.

902

903 Kobayashi Y, Ando H. 1990. Early embryonic development and external features of  
904 developing embryos of the caddisfly, *Nemotaulius admorsus* (Trichoptera:  
905 *Limnephilidae*). *J Morphol* 203:69-85.

906

907 Kobayashi Y, Suzuki H, Ohba N. 2003. Development of the pleuropodia in the  
908 embryo of the glowworm *Rhagophthalmus ohbai* (Rhagophthalmidae, Coleoptera,  
909 *Insecta*), with comments on their probable function. *Proc Arthropod Embryol Soc*  
910 *Jpn* 38:19-26.

911

912 Konopova B, Zrzavy J. 2005. Ultrastructure, development, and homology of insect  
913 embryonic cuticles. *J Morphol* 264:339-362.

914

915 Lambiase S, Grigolo A, Morbini P. 2003. Ontogenesis of pleuropodia in defferent  
916 species of Blattaria (Insecta): a comparative study. *Ital J Zool* 70:205-212.

917

918 Langmead B, Trapnell C, Pop M, Salzberg SL. 2009. Ultrafast and memory-efficient  
919 alignment of short DNA sequences to the human genome. *Genome Biol* 10:R25.

920

921 Larink O. 1983. Embryonic and postembryonic development of Machilidae and  
922 Lepismatidae (Insecta: Archaeognatha). *Entomol Gen* 8:119-133.

923

924 Lemaitre B, Hoffmann J. 2007. The host defense of *Drosophila melanogaster*. *Annu*  
925 *Rev Immunol* 25:697-743.

926

927 Lenaerts C, Van Wielendaele P, Peeters P, Vanden Broeck J, Marchal E. 2016.  
928 Ecdysteroid signalling components in metamorphosis and development of the  
929 desert locust, *Schistocerca gregaria*. *Insect Biochem Mol Biol* 75:10-23.

930

931 Lewis DL, DeCamillis M, Bennett RL. 2000. Distinct roles of the homeotic genes *Ubx*  
932 and *abd-A* in beetle embryonic abdominal appendage development. *Proc Natl Acad*  
933 *Sci USA* 97:4504-4509.

934

935 Li D, Zhang J, Wang Y, Liu X, Ma E, Sun Y, Li S, Zhu KY, Zhang J. 2015. Two chitinase 5  
936 genes from *Locusta migratoria*: molecular characteristics and functional  
937 differentiation. *Insect Biochem Mol Biol* 58:46-54.

938

939 Liu HW, Wang LL, Tang X, Dong ZM, Guo PC, Zhao DC, Xia QY, Zhao P. 2018.  
940 Proteomic analysis of *Bombyx mori* molting fluid: Insights into the molting process. *J*  
941 *Proteomics* 173:115-125.

942

943 Locke M, Krishnan N. 1973. The formation of the ecdysial droplets and the ecdysial  
944 membrane in an insect. *Tissue Cell* 5:441-450.

945

946 Louvet JP. 1973. L'ultrastructure du pleuropode et son ontogenèse, chez l'embryon  
947 du phasme *Carausius morosus* Br. I. – Étude du pleuropode de l'embryon agé. *Ann*  
948 *Sci Nat Zool* 12:525-594.

949

950 Louvet JP. 1975. Premières observations sur l'ultrastructure du pleuropode chez le  
951 Criquet migrateur. *C R Acad Sci Paris D* 280: 1301-1304.

952

953 Louvet JP. 1983. Ultrastrucutre du pleuropode chez l'embryon du hanneton  
954 *Rhizotrogus majalis* Razoum (Coleoptera: Melolonthidae). *Int J Insect Morphol*  
955 *Embryol* 12:97-117.

956

- 957 Love MI, Huber W, Anders S. 2014. Moderated estimation of fold change and  
958 dispersion for RNA-seq data with DESeq2. *Genome Biol* 15:550.  
959
- 960 Machida R. 1981. External features of embryonic development of a jumping  
961 bristletail, *Pedetontus unimaculatus* Machida (Insecta, Thysanura, Machilidae). *J*  
962 *Morphol* 168:339-355.  
963
- 964 Machida R, Tojo K, Tsutsumi T, Uchifune T, Klass K-D, Picker MD, Pretorius L. 2004.  
965 Embryonic development of heel-walkers: reference to some prerevolutionary stages  
966 (Insecta: Mantophasmatodea). *Proc Arthropod Embryol Soc Jpn* 39:31-39.  
967
- 968 Marchal E, Badisco L, Verlinden H, Vandersmissen T, Van Soest S, Van Wielendaele P,  
969 Vanden Broeck J. 2011. Role of the Halloween genes, Spook and Phantom in  
970 ecdysteroidogenesis in the desert locust, *Schistocerca gregaria*. *J Insect Physiol*  
971 57:1240-1248.  
972
- 973 Marchal E, Verlinden H, Badisco L, Van Wielendaele P, Vanden Broeck J. 2012. RNAi-  
974 mediated knockdown of Shade negatively affects ecdysone-20-hydroxylation in the  
975 desert locust, *Schistocerca gregaria*. *J Insect Physiol* 58:890-896.  
976
- 977 Mashimo Y, Beutel RG, Dallai R, Lee CY, Machida R. 2013. Embryonic development of  
978 Zoraptera with special reference to external morphology, and its phylogenetic  
979 implications (Insecta). *J Morphol* 275:295-312.

980

981 Miller A. 1940. Embryonic membranes, yolk cells, and morphogenesis of the stonefly

982 *Pteronarcys proteus* Newman (Plecoptera: Pteronarcidae). *Ann Entomol Soc Amer*

983 33:437-477.

984

985 Mohamed AA, Zhang L, Dorrah MA, Elmogy M, Yousef HA, Bassal TT, Duvic B. 2016.

986 Molecular characterization of a c-type lysozyme from the desert locust, *Schistocerca*

987 *gregaria* (Orthoptera: Acrididae). *Dev Comp Immunol* 61:60-69.

988

989 Mortazavi A, Williams BA, McCue K, Schaeffer L, Wold B. 2008. Mapping and

990 quantifying mammalian transcriptomes by RNA-Seq. *Nat Methods* 5:621–628.

991

992 Miyakawa K. 1979. Embryology of the dobsonfly, *Protohermes grandis* Thunberg

993 (Megaloptera: Corydalidae), I. Changes in External form of the embryo during

994 development. *Kontyû* 47: 367-375.

995

996 Nijhout HF. 1994. *Insect hormones*. Princeton: Princeton University Press.

997

998 Niwa R, Matsuda T, Yoshiyama T, Namiki T, Mita K, Fujimoto Y, Kataoka H. 2004.

999 CYP306A1, a cytochrome P450 enzyme, is essential for ecdysteroid biosynthesis in

1000 the prothoracic glands of *Bombyx* and *Drosophila*. *J Biol Chem* 279:35942-35949.

1001

- 1002 Niwa R, Niwa YS. 2014. Enzymes for ecdysteroid biosynthesis: their biological  
1003 functions in insects and beyond. *Biosci Biotechnol Biochem* 78:1283-1292.  
1004
- 1005 Noh MY, Muthukrishnan S, Kramer KJ, Arakane Y. 2018. A chitinase with two  
1006 catalytic domains is required for organization of the cuticular extracellular matrix  
1007 of a beetle. *PLoS Genet* 14:e1007307.  
1008
- 1009 Norling U. 1982. Structure and ontogeny of the lateral abdominal gills and the  
1010 caudal gills in Euphaenidae (Odonata: Zygoptera) larvae. *Zool Jb Anat* 107:343-389.  
1011
- 1012 Novak VJA, Zambre SK. 1974. To the problem of structure and function of  
1013 pleuropodia in *Schistocerca gregaria* FORSKÅL embryos. *Zool Jb Physiol* 78:344-  
1014 355.  
1015
- 1016 Ou Q, Zeng J, Yamanaka N, Brakken-Thal C, O'Connor MB, King-Jones K. 2016. The  
1017 Insect Prothoracic Gland as a Model for Steroid Hormone Biosynthesis and  
1018 Regulation. *Cell Rep* 16:247-262.  
1019
- 1020 Pagès H, Aboyoun P, Gentleman R and DebRoy S. 2017. Biostrings: Efficient  
1021 manipulation of biological strings. R package version 2.46.0.  
1022
- 1023 Panfilio KA. 2008. Extraembryonic development in insects and the acrobatics of  
1024 blastokinesis. *Dev Biol* 313:471-491.

1025

1026 Perteua G, Huang X, Liang F, Antonescu V, Sultana R, Karamycheva S, Lee Y, White J,  
1027 Cheung F, Parvizi B, Tsai J, Quackenbush J. 2003. TIGR Gene Indices clustering tools  
1028 (TGICL): a software system for fast clustering of large EST datasets. *Bioinformatics*  
1029 19:651-652.

1030

1031 Petryk A, Warren JT, Marqués G, Jarcho MP, Gilbert LI, Kahler J, Parvy JP, Li Y,  
1032 Dauphin-Villemant C, O'Connor MB. 2003. Shade is the *Drosophila* P450 enzyme  
1033 that mediates the hydroxylation of ecdysone to the steroid insect molting hormone  
1034 20-hydroxyecdysone. *Proc Natl Acad Sci USA* 100:13773-13778.

1035

1036 Pesch YY, Riedel D, Patil KR, Loch G, Behr M. 2016. Chitinases and Imaginal disc  
1037 growth factors organize the extracellular matrix formation at barrier tissues in  
1038 insects. *Sci Rep* 6:18340.

1039

1040 Prpic NM, Wigand B, Damen WG, Klingler M. 2001. Expression of dachshund in wild-  
1041 type and Distal-less mutant *Tribolium* corroborates serial homologies in insect  
1042 appendages. *Dev Genes Evol* 211:467-477.

1043

1044 Qu M, Ma L, Chen P, Yang Q. 2014. Proteomic analysis of insect molting fluid with a  
1045 focus on enzymes involved in chitin degradation. *J Proteome Res* 13:2931-2940.

1046



1047 R Development Core Team. 2008. R: A language and environment for statistical  
1048 computing. R Foundation for Statistical Computing, Vienna, Austria. ISBN 3-900051-  
1049 07-0.  
1050  
1051 Rau A, Gallopin M, Celeux G, Jaffrezic F. 2013. Data-based filtering for replicated  
1052 high-throughput transcriptome sequencing experiments. *Bioinformatics* 29:2146-  
1053 2152.  
1054  
1055 Rathke H. 1844. Zur Entwicklungsgeschichte der Maulwurfsgrille (*Gryllotalpa*  
1056 *vulgaris*). *Arch Anat Physiol wiss Med* 27-37.  
1057  
1058 Reynolds SE, Samuels R. 1996. Physiology and biochemistry of insect moulting fluid.  
1059 *Adv In Insect Phys* 26:157-232.  
1060  
1061 Rong S, Li DQ, Zhang XY, Li S, Zhu KY, Guo YP, Ma EB, Zhang JZ. 2013. RNA  
1062 interference to reveal roles of  $\beta$ -N-acetylglucosaminidase gene during molting  
1063 process in *Locusta migratoria*. *Insect Sci* 20:109-119.  
1064  
1065 Roonwall ML. 1937. Studies on the embryology of the African migratory locust,  
1066 *Locusta migratoria migratorioides* Reiche and Frm. (Orthoptera, Acrididae). II.  
1067 Organogeny. *Philos Trans R Soc Lond B Biol Sci* 227: 175-244.  
1068

1069 Rost MM, Poprawa I, Klag J. 2004. Ultrastructure of the pleuropodium in 8-d-old  
1070 embryos of *Thermobia domestica* (Packard) (Insecta, Zygentoma). *Ann Entomol Soc*  
1071 *Amer* 97:541-547.  
1072  
1073 Schulz MH, Zerbino DR, Vingron M, Birney E. 2012. Oases: robust de novo RNA-seq  
1074 assembly across the dynamic range of expression levels. *Bioinformatics* 28:1086-  
1075 1092.  
1076  
1077 Shi L, Paskewitz SM. 2004. Identification and molecular characterization of two  
1078 immune- responsive chitinase-like proteins from *Anopheles gambiae*. *Insect Mol*  
1079 *Biol* 13:387-398.  
1080  
1081 Shutts JH. 1952. Some characteristics of the hatching enzyme in the eggs of  
1082 *Melanoplus differentialis* (Thomas). *Proc S Dak Acad Sci* 31:158-163.  
1083  
1084 Simão FA, Waterhouse RM, Ioannidis P, Kriventseva EV, Zdobnov EM. 2015. BUSCO:  
1085 assessing genome assembly and annotation completeness with single-copy  
1086 orthologs. *Bioinformatics*. 31:3210-3212.  
1087  
1088 Slifer EH. 1937. The origin and fate of the membranes surrounding the grasshopper  
1089 egg; together with some experiments on the source of the hatching enzyme. *Q J Micr*  
1090 *Sci* 79:493-506.  
1091

- 1092 Slifer EH. 1938. A cytological study of the pleuropodia of *Melanoplus differentialis*  
1093 (Orthoptera, Acrididae) which furnishes new evidence that they produce the  
1094 hatching enzyme. *J Morphol* 63:181-206.  
1095
- 1096 Stanley MSM, Grundmann AW. 1970. The embryonic development of *Tribolium*  
1097 *confusum*. *Ann Entomol Soc Amer* 63:1248-1256.  
1098
- 1099 Stay B. 1977. Fine structure of two types of pleuropodia in *Diploptera punctata*  
1100 (Dictyoptera: Blaberiadae) with observations on their permeability. *Int J Insect*  
1101 *Morphol Embryol* 6:67-95.  
1102
- 1103 Sugahara R, Tanaka S and Shiotsuki T. 2017. RNAi-mediated knockdown of SPOOK  
1104 reduces ecdysteroid titers and causes precocious metamorphosis in the desert  
1105 locust *Schistocerca gregaria*. *Dev Biol* 429:71-80.  
1106
- 1107 Sui Y-P, Liu X-B, Chai L-Q, Wang J-X, Zhao X-F. 2009. Characterization and influences  
1108 of classical insect hormones on the expression profiles of a molting  
1109 carboxypeptidase A from the cotton bollworm (*Helicoverpa armigera*). *Insect Mol*  
1110 *Biol* 18:353-363.  
1111
- 1112 Supek F, Bošnjak M, Škunca N, Šmuc T. 2011. REVIGO Summarizes and Visualizes  
1113 Long Lists of Gene Ontology Terms. *PLoS ONE* 6: e21800.  
1114

- 1115 Tanaka M, Kobayashi Y, Ando H. 1985. Embryonic development of the nervous  
1116 system and other ectodermal derivatives in the primitive moth, *Endoclita sinensis*  
1117 (Lepidoptera, Hepialidae). In: Ando H, Miya K, editors. Recent Advances in Insect  
1118 Embryology in Japan. Tsukuba: Isebu Co. Ltd. p 215-229.  
1119
- 1120 Tanizawa T, Ando H, Tojo K. 2007. Notes on the pleuropodia in the giant water bug  
1121 *Appasus japonicus* (Heteroptera, Belostomatidae). Proc Arthropod Embryol Soc Jpn  
1122 42:9-11.  
1123
- 1124 Tarazona S, García-Alcalde F, Dopazo J, Ferrer A, Conesa A. 2011. Differential  
1125 expression in RNA-seq: a matter of depth. Genome Res 21:2213-2223.  
1126
- 1127 Tear G, Akam M, Martinez-Arias A. 1990. Isolation of an abdominal-A gene from the  
1128 locust *Schistocerca gregaria* and its expression during early embryogenesis.  
1129 Development 110:915-925.  
1130
- 1131 Tsutsumi K, Machida R. 2006. Embryonic development of a snakefly, *Inocellia*  
1132 *japonica* Okamoto: an outline (Insecta: Neuroptera, Raphidioidea). Proc Arthropod  
1133 Embryol Soc Jpn 41: 37-45.  
1134
- 1135 Uchifune T, Machida R. 2005. Embryonic development of *Galloisiana yuasai* Asahina,  
1136 with special reference to external morphology (insecta: Grylloblattodea). J Morphol  
1137 266:182-207.

1138

1139 Untergasser A, Nijveen H, Rao X, Bisseling T, Geurts R, and Leunissen JMA. 2007.

1140 Primer3Plus, an enhanced web interface to Primer3. *Nucleic Acids Research* 35:

1141 W71-W74.

1142

1143 Viscuso R, Sottile L. 2008. Fine structure of pleuropodia in three species of Insecta

1144 Orthoptera during embryonic development. *Ital J Zool (Modena)* 75: 11-19.

1145

1146 Xi Y, Pan PL, Ye YX, Yu B, Xu HJ, Zhang CX. 2015. Chitinase-like gene family in the

1147 brown planthopper, *Nilaparvata lugens*. *Insect Mol Biol* 24:29-40.

1148

1149 Warren JT, Petryk A, Marques G, Jarcho M, Parvy JP, Dauphin-Villemant C, O'Connor

1150 MB, Gilbert LI. 2002. Molecular and biochemical characterization of two P450

1151 enzymes in the ecdysteroidogenic pathway of *Drosophila melanogaster*. *Proc Natl*

1152 *Acad Sci USA* 99:11043-11048.

1153

1154 Warren JT, Petryk A, Marqués G, Parvy JP, Shinoda T, Itoyama K, Kobayashi J, Jarcho

1155 M, Li Y, O'Connor MB, Dauphin-Villemant C, Gilbert LI. 2004. Phantom encodes the

1156 25-hydroxylase of *Drosophila melanogaster* and *Bombyx mori*: a P450 enzyme

1157 critical in ecdysone biosynthesis. *Insect Biochem Mol Biol* 34:991-1010.

1158

1159 Waterhouse RM, Seppey M, Simão FA, Manni M, Ioannidis P, Klioutchnikov G,  
1160 Kriventseva EV, Zdobnov EM. 2018. BUSCO applications from quality assessments to  
1161 gene prediction and phylogenomics. *Mol Biol Evol* 35:543-548.  
1162  
1163 Wei Z, Yin Y, Zhang B, Wang Z, Peng G, Cao Y, Xia Y. 2007. Cloning of a novel protease  
1164 required for the molting of *Locusta migratoria manilensis*. *Dev Growth Differ*  
1165 49:611-621.  
1166  
1167 Wheeler WMM. 1889. On the appendages of the first abdominal segment of embryo  
1168 insects. *Trans Wis Acad Sci Arts Lett* 8:87-140, pls 1-3.  
1169  
1170 Yan J, Cheng Q, Narashimhan S, Li CB, Aksoy S. 2002. Cloning and functional  
1171 expression of a fat body-specific chitinase cDNA from the tsetse fly, *Glossina*  
1172 *morsitans morsitans*. *Insect Biochem Mol Biol* 32:979-989.  
1173  
1174 Young MD, Wakefield MJ, Smyth GK and Oshlack A. 2010. Gene ontology analysis for  
1175 RNA-seq: accounting for selection bias. *Genome Biol* 11:R14.  
1176  
1177 Zerbino DR, Birney E. 2008. Velvet: algorithms for de novo short read assembly  
1178 using de Bruijn graphs. *Genome Res* 18:821-829.  
1179

- 1180 Zhang J, Lu A, Kong L, Zhang Q, Ling E. 2014. Functional analysis of insect molting  
1181 fluid proteins on the protection and regulation of ecdysis. *J Biol Chem* 289:35891-  
1182 35906.
- 1183
- 1184 Zhang H, Shinmyo Y, Mito T, Miyawaki K, Sarashina I, Ohuchi H, Noji S. 2005.  
1185 Expression patterns of the homeotic genes *Scr*, *Antp*, *Ubx*, and *abd-A* during  
1186 embryogenesis of the cricket *Gryllus bimaculatus*. *Gene Expr Patterns* 5:491-502.
- 1187
- 1188 Zhu Q, Arakane Y, Beeman RW, Kramer, KJ, Muthukrishnan S. 2008. Functional  
1189 specialization among insect chitinase family genes revealed by RNA interference.  
1190 *Proc Natl Acad Sci USA* 105:6650-6655.
- 1191
- 1192 Zhu KY, Merzendorfer H, Zhang W, Zhang J, Muthukrishnan S. 2016. Biosynthesis,  
1193 Turnover, and Functions of Chitin in Insects. *Annu Rev Entomol* 61:177-196.

1194 **FIGURE 1**

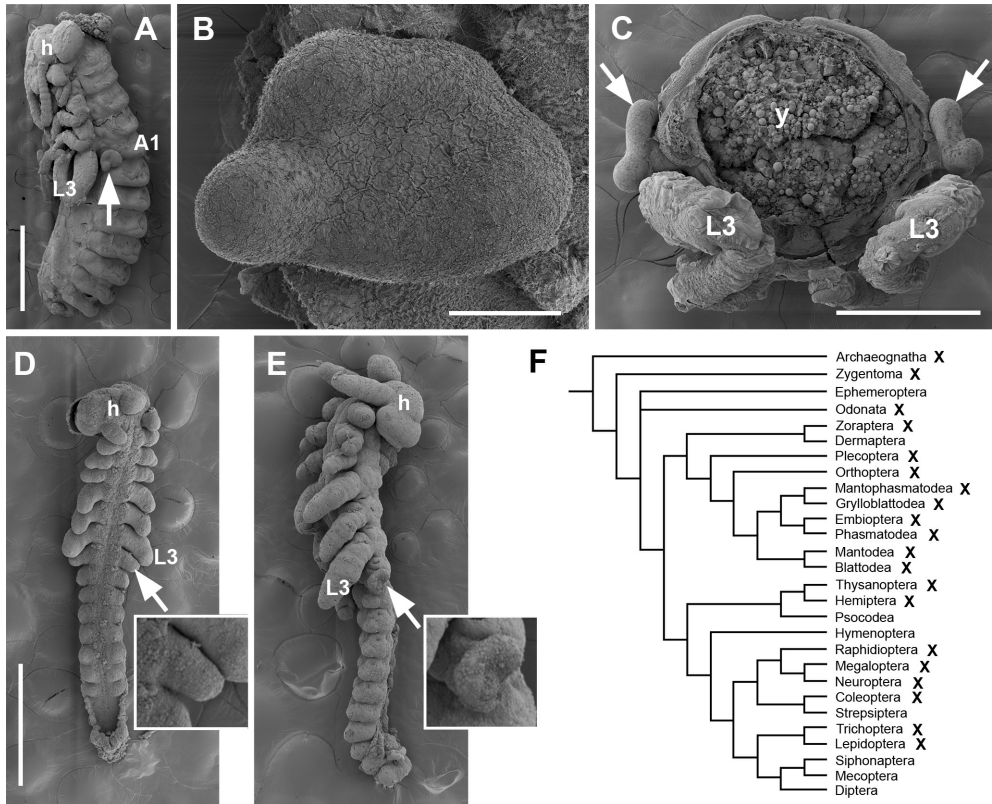

1195

1196 **Figure 1. Pleuropodia are limb-derived organs on A1 of insect embryos. (A)-**

1197 **(C): External morphology of fully developed pleuropodia of *Schistocerca gregaria*.**

1198 **(A) Embryo before dorsal closure (yolk was removed). (B) Enlarged left**

1199 **pleuropodium. (C) Cross section through A1. (D) and (E): Pleuropodia originate by a**

1200 **modification of a limb bud. (D) Early embryo: all appendages are similarly looking**

1201 **buds. (E) Older embryo: future legs elongate and the buds on A1 start to take shape**

1202 **of pleuropodia. (F) Insect phylogenetic tree showing the presence of pleuropodia**

1203 **among “orders”. The cross marks “orders” where at least some species develop**

1204 **pleuropodia. Phylogeny from Kjer et al., 2016, other references in the text. (A)-(E)**

1205 **are scanning electron microscopy (SEM) micrographs. Pleuropodium is marked with**



1206 an arrow. A1, the first abdominal segment; h, head; L3, hind (third) leg; y, yolk. Scale  
1207 bars: in (A), 1 mm; in (B), 100  $\mu\text{m}$ ; in (C); 500  $\mu\text{m}$ ; in (D), for (D) and (E), 500  $\mu\text{m}$ .

1208 **FIGURE 2**

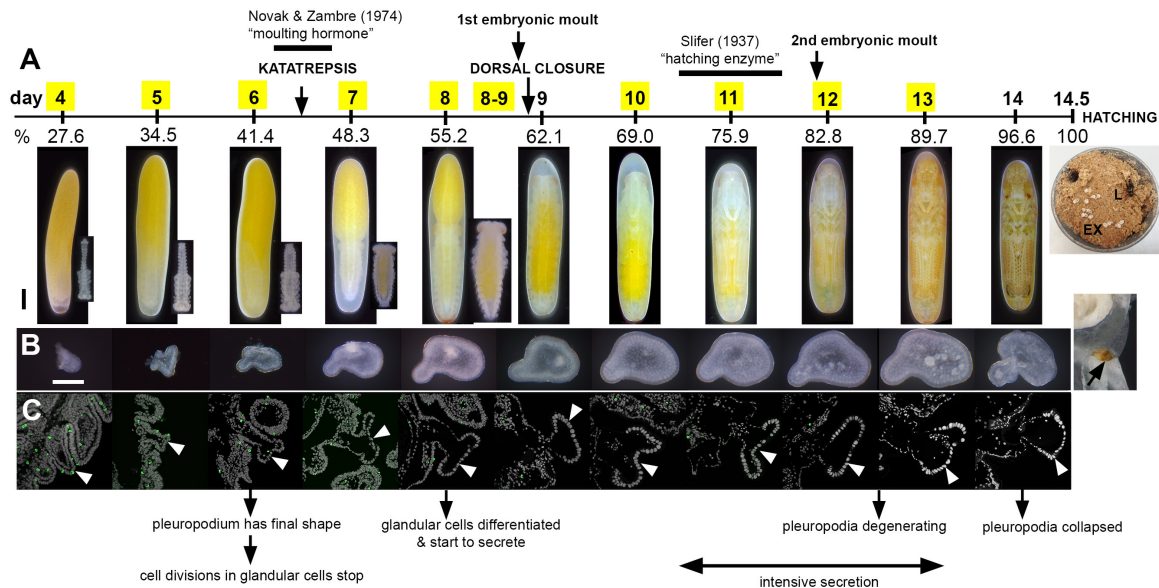

1209

1210 **Figure 2. Summary of the development of pleuropodia in *Schistocerca***

1211 **embryos.** (A) Scheme of *Schistocerca* embryogenesis marking key developmental

1212 events in the embryos and timing of the two experiments on pleuropodia. Numbers

1213 above the scale are days from egg-laying, numbers below the scale are percent of

1214 embryonic developmental time. Yellow boxes indicate the stages that were sampled

1215 for RNA-seq. Eggs with the developing embryos at each stage are shown below the

1216 scale, insets for the 4-8 day stages show the embryo dissected out from the egg. (B)

1217 External features of the developing pleuropodia; after hatching part of the stretched

1218 exuvia is shown; the degenerated pleuropodium is marked with an arrow. (C)

1219 Paraffin sections through the pleuropodium and surrounding tissue. Pleuropodia

1220 are marked with arrowheads. PH3 (green) detects cell divisions in the immature

1221 glandular cells (tip of appendage bud) on day 4 and 5, not in later stages. The

1222 pleuropodial stalk cells, haemocytes entering the pleuropodia and cells in other

1223 tissues were labeled. Nuclei (grey) enlarge from day 6. The text below the pictures  
1224 refers to the main events in the glandular cells. EX, exuvia; L, larva. Scale bars: in (A)  
1225 (eggs), 1 mm; in (B), 0.2 mm. Background was cleaned in photos in A (see Materials  
1226 and Methods).

1227 **FIGURE 3**

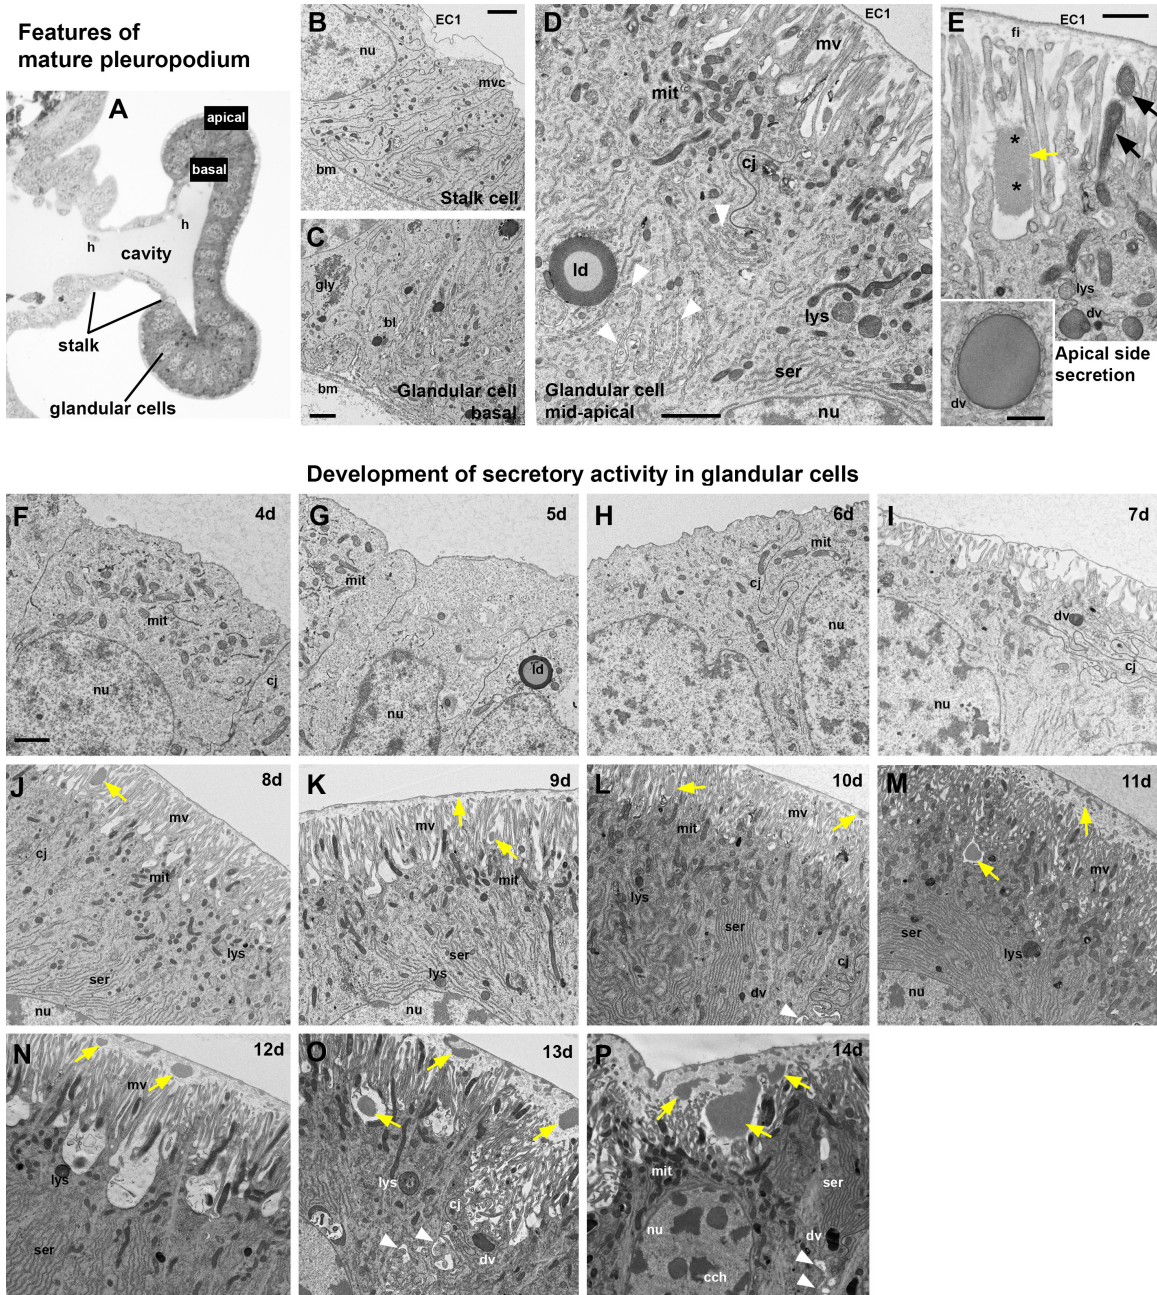

1228

1229 **Figure 3. Ultrastructure of the *Schistocerca* pleuropodia.** (A)-(E) Main features  
 1230 of the cells in the fully formed pleuropodia. Pleuropodia just before dorsal closure  
 1231 are shown. (A) Cross section through the pleuropodium. (B) Stalk cell. The short  
 1232 microvilli at the apical side are associated with the deposition of fibres in the

1233 embryonic cuticle (“the first embryonic cuticle”, EC1). (C)-(E) Glandular cells. In (D)  
1234 the white arrowheads mark the spaces between neighboring cells. In (E) the black  
1235 arrows mark mitochondria inside the microvilli and the asterisks mark spots of  
1236 different electron-density in the secreted granule. Note that the secretion granule is  
1237 located at the base of the microvilli (brush-border); the tips of the microvilli  
1238 produce fibrous material that is a part of the embryonic cuticle EC1. (F)-(P)  
1239 Ontogenesis of the glandular cells. Note the development of the microvilli (brush  
1240 border) and the onset of secretion (appearance of secretion granules within and  
1241 above the microvilli). On day 8 (J) the glandular cells are differentiated, on day 12  
1242 (N) patches of the apical side elevate, on day 13 (O) the organelles are disorganized,  
1243 on day 14 (P) cytoplasm is electron dense (cells shrink), chromatin condensed, but  
1244 large secretion granules are still present at the base of microvilli and above them.  
1245 (A) is a toluidine blue stained semithin section, (B)-(P) TEM micrographs. Secretion  
1246 granules are marked with yellow arrows. bm, basement membrane; bl, basal  
1247 labyrinth (infolding of the basal plasma membrane); cj, cell junction; dv, dense  
1248 vesicle; EC1, the first embryonic cuticle; gly, glycogene; ld, lipid droplet; mit,  
1249 mitochondria; mv, microvilli; nu, nucleus; ser, smooth endoplasmic reticulum. Scale  
1250 bars: in (B), (C), (D), (E) and (F) for (F)-(P), 2  $\mu$ m; inset in (E), 500 nm.

1251 **FIGURE 4**

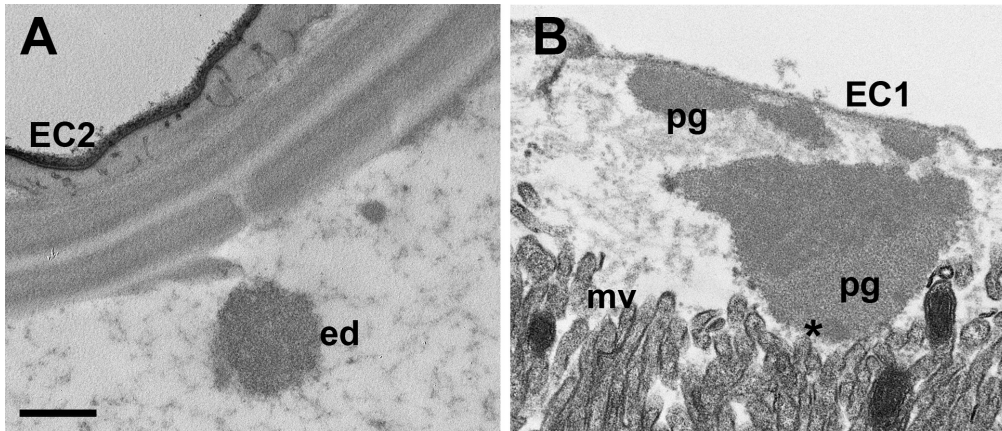

1252

1253 **Figure 4. Granules secreted from the pleuropodia resemble ecdysial droplets.**

1254 (A) Ecdysial droplet secreted during the second embryonic moult by hind leg

1255 epidermis. (B) Granules secreted from pleuropodia at the same developmental

1256 stage. The pleuropodial granules are typically larger, less compact and with non-

1257 homogeneous electron density. The “spot” of a different electron density in the

1258 pleuropodial granules is marked with an asterisk. EC1, EC2, the first and second

1259 embryonic cuticles; ed, ecdysial droplets; mv, microvilli; pg, granules secreted from

1260 the pleuropodia. Scale bar: for (A) and (B), 500 nm.

1261 **FIGURE 5**

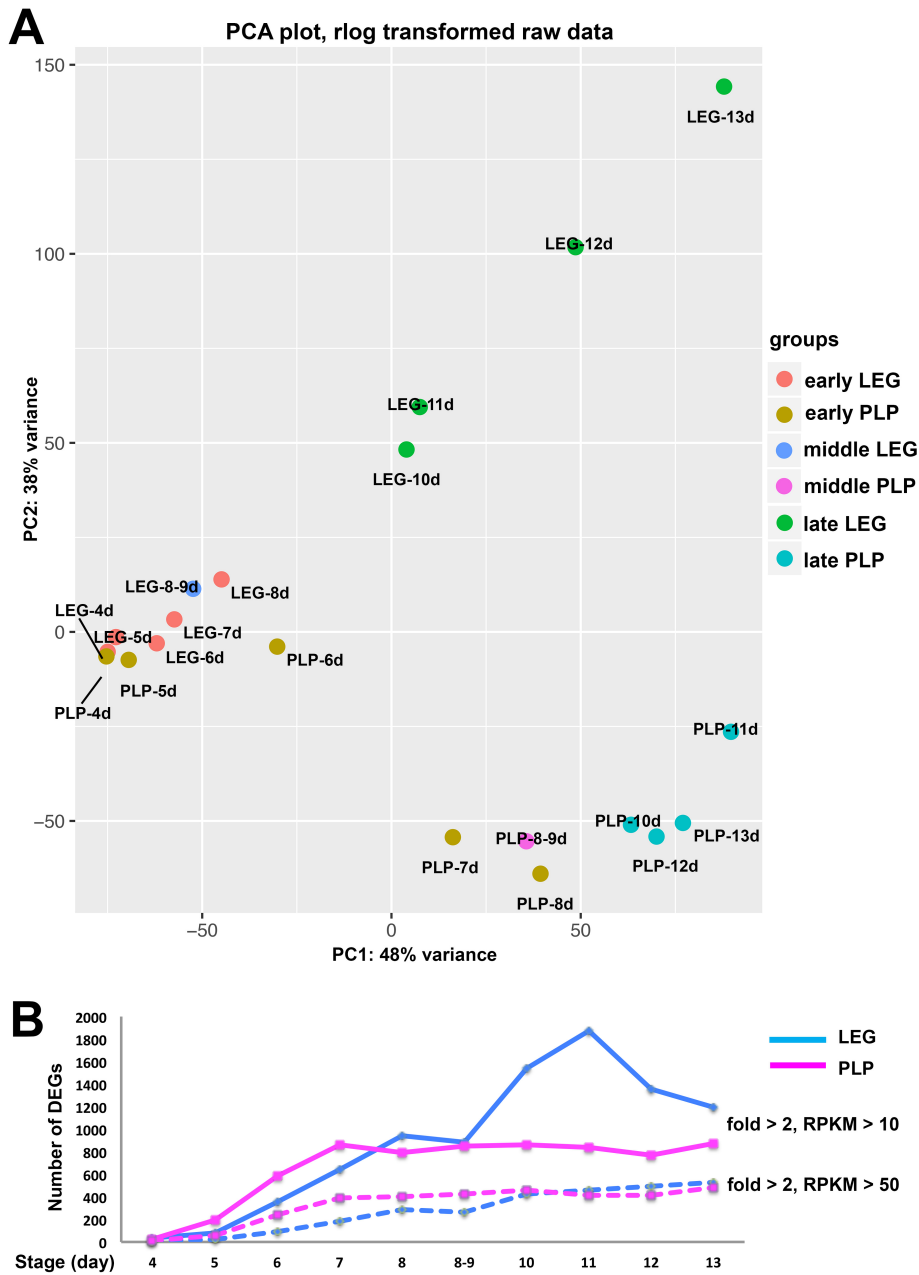

1262

1263 **Figure 5. Legs and pleuropodia become genetically more different as**

1264 **development progresses.** (A) PCA on genes expressed in legs and pleuropodia at

1265 ten embryonic stages (rlog transformed read counts). Samples from young embryos

1266 are genetically more similar and cluster together, while samples from advanced

1267 stages are genetically more distant and also separated on the plot. (B) Number of  
1268 DEGs at two levels of stringency (RPKM > 10 and fold change > 2 was considered as  
1269 a threshold for a gene to be differentially expressed). LEG, DEGs downregulated in  
1270 pleuropodia and upregulated in legs, PLP, DEGs upregulated in pleuropodia and  
1271 downregulated in legs.



1272 **FIGURE 6**

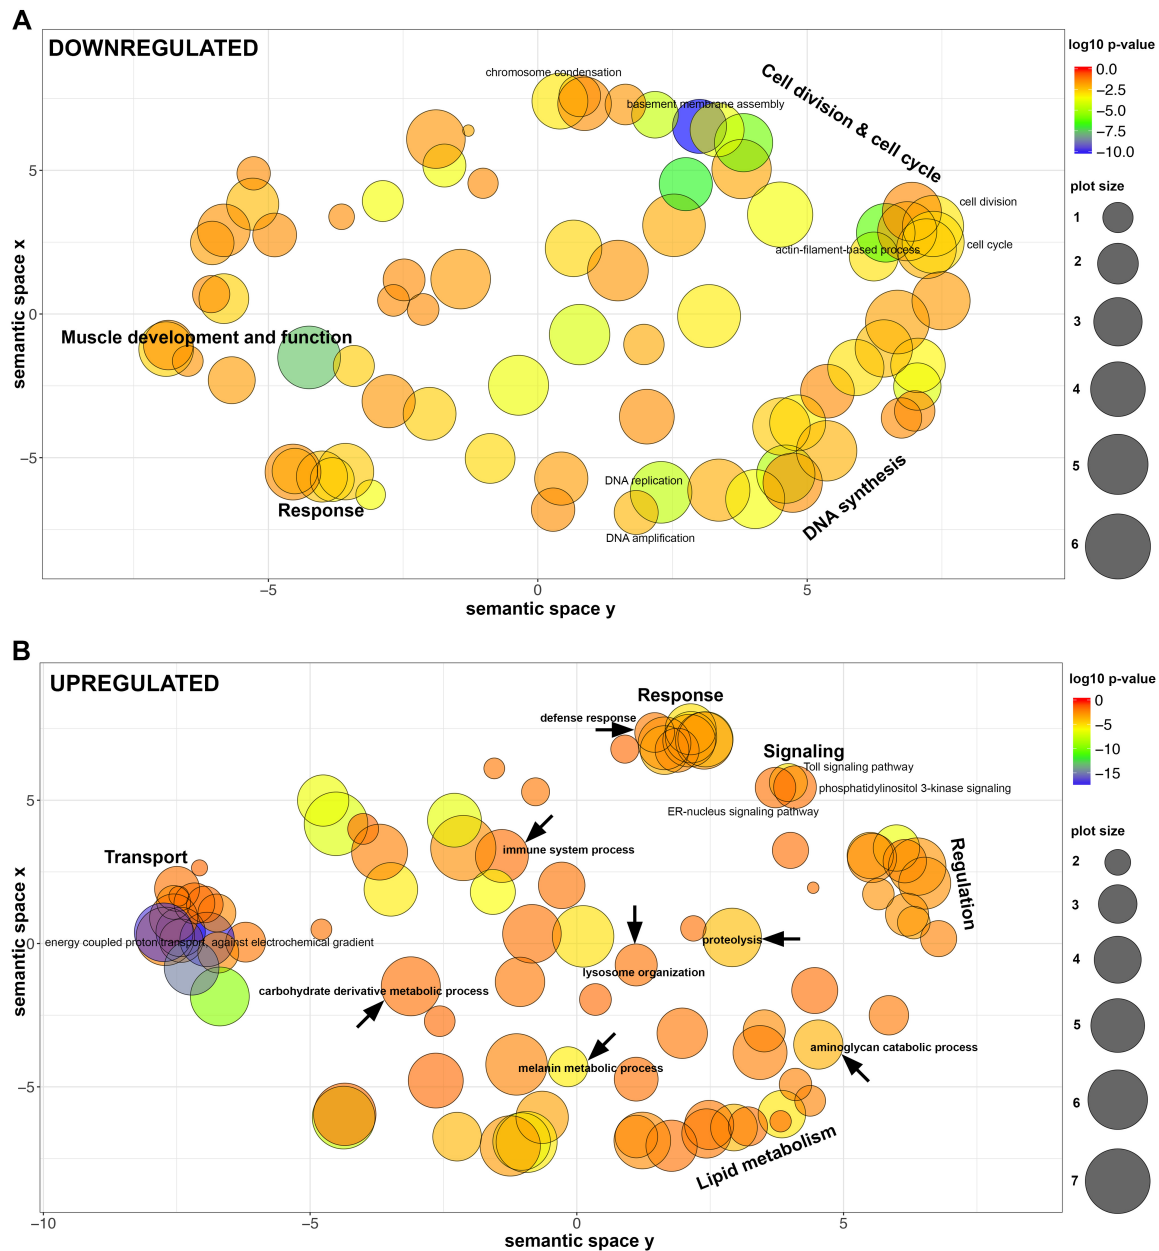

1273

1274 **Figure 6. Dot plot visualization of GO terms enriched in DEGs in the highly**  
1275 **secreting pleuropodia.** Representative groups of GO terms enriched in genes that  
1276 are (A) downregulated in pleuropodia (in comparison to legs) and (B) upregulated  
1277 in pleuropodia. Major clusters are labeled. Relevant GOs are marked with an arrow.  
1278 Bubble color indicates the p-value of the GO term, the size indicates the frequency of

1279 the GO term in the underlying Gene Ontology Annotation (GOA) database (bubbles  
1280 of more general terms are larger).

1281 **FIGURE 7**

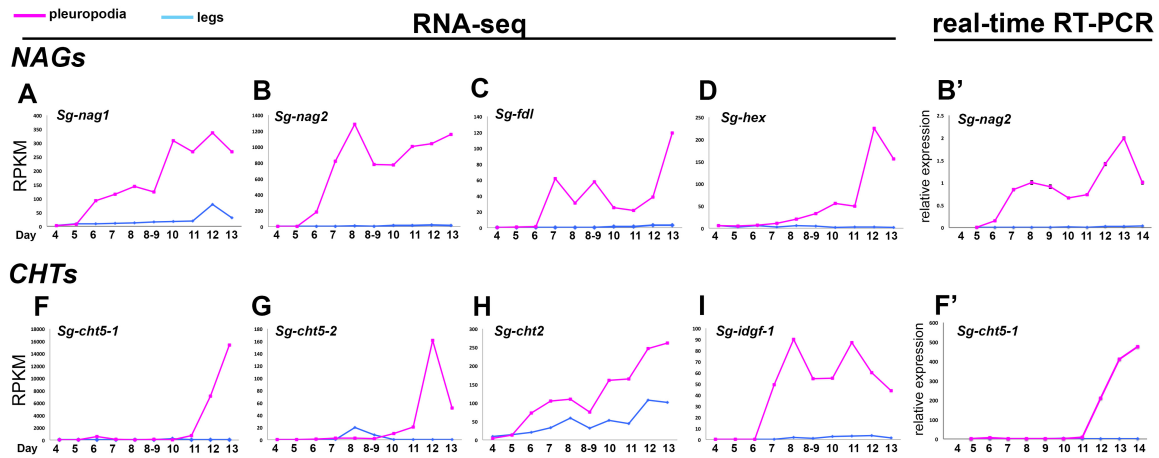

1282

1283 **Figure 7. Expression profiles of NAGs and CHTs upregulated in the**

1284 **pleuropodia of *Schistocerca* across development.** Top row: NAGs, bottom row:

1285 CHTs. (A-D) and (F)-(I): RNA-seq, Expression in single-sample sequencing is shown.

1286 (B') and (F'): real-time RT-PCR. (B') is the same gene as in (B) and (F') is the same

1287 gene as in (F). Analysis of 3-4 technical replicates is shown. Expression in day 8 was

1288 set as 1.

1289 **FIGURE 8**

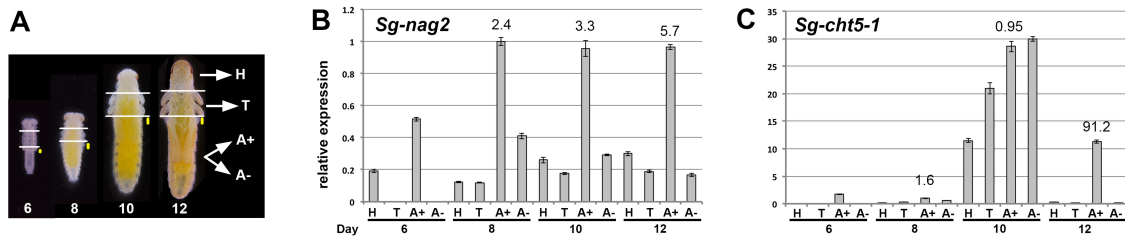

1290

1291 **Figure 8. Real-time RT-PCR expression analysis of *Sg-nag2* and *Sg-cht5-1* on**  
1292 **cDNA from parts of *Schistocerca* embryos. (A) cDNA was prepared from mRNAs**  
1293 **isolated from parts of embryos at the age of 6, 8, 10 and 12 days: H, head; T, thorax;**  
1294 **A+, abdomen with pleuropodia; A-, abdomen without pleuropodia. For each age the**  
1295 **same number of body parts was used (5-10) and RNA was resuspended in the same**  
1296 **volume of water. The size of the pleuropodium is indicated by the yellow dot. (B)**  
1297 **and (C): expression of *Sg-nag2* and *Sg-cht5-1*, respectively. Analysis of 3-4 technical**  
1298 **replicates is shown. Expression in A+8 (abdomen with pleuropodia at stage when**  
1299 **the organs first become differentiated) was set as 1. Numbers above A+ expression**  
1300 **is fold change from A- of the same age.**

1301 **FIGURE 9**

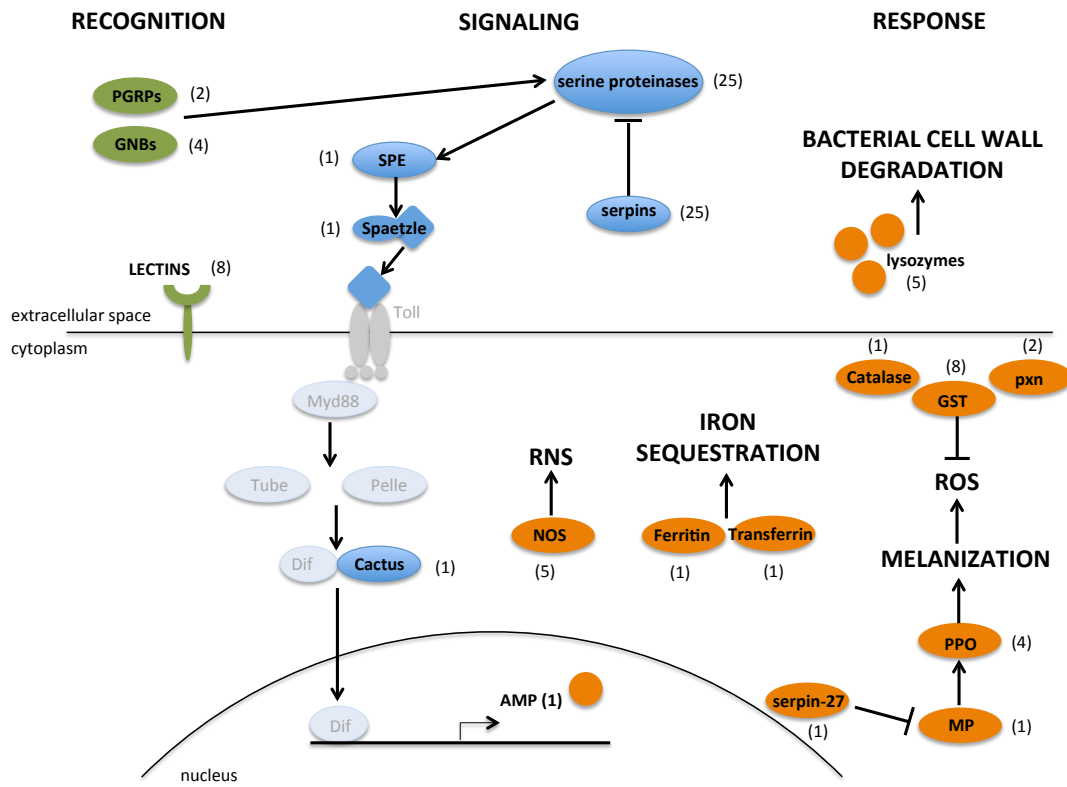

1302

1303 **Figure 9. Schematic representation of key immunity-related genes expressed**  
 1304 **in the highly secreting pleuropodia of *Schistocerca*.** Proteins whose transcripts  
 1305 were found in the pleuropodia are in black, number in the brackets is the number of  
 1306 upregulated transcripts. Proteins whose transcripts were not upregulated are in  
 1307 grey. Out of the total 25 serine proteases and 25 serpins, 14 and 15 are known to  
 1308 function in Toll signaling, respectively. AMP, antimicrobial peptide; GNB, gram-  
 1309 negative bacteria-binding protein; GST, glutathione S-transferase; MP, melanization  
 1310 protease; NOS, nitric oxide synthase; PGRP, peptidoglycan recognition protein; PPO,  
 1311 pro-phenoloxidase; pxn, peroxiredoxin; RNS, reactive nitrogen species; ROS,  
 1312 reactive oxygen species; SPE, Spaetzle-processing enzyme.

1313 **FIGURE 10**

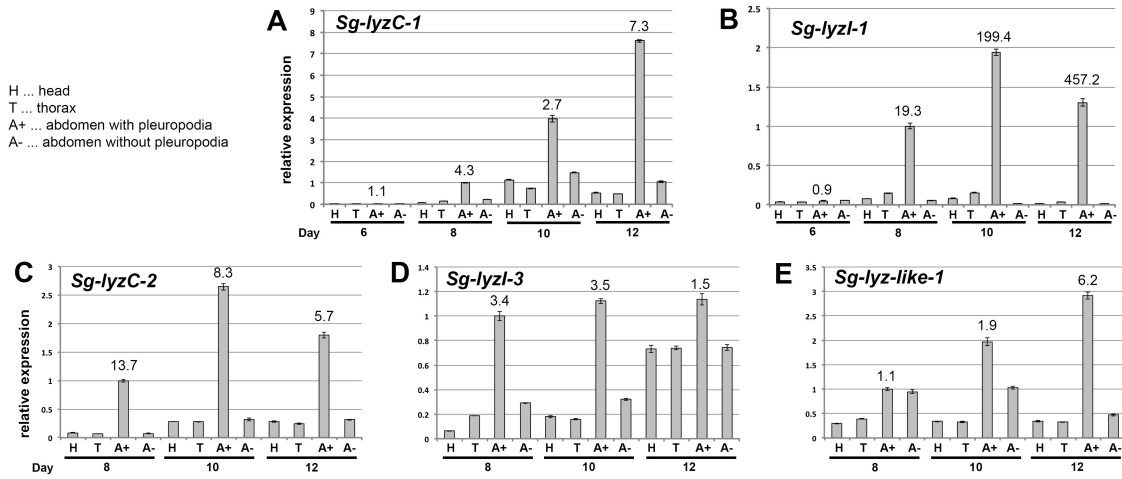

1314

1315 **Figure 10. Real-time RT-PCR expression analysis of genes for lysozymes on**  
 1316 **cDNA from parts of *Schistocerca* embryos.** cDNA was prepared from mRNAs  
 1317 isolated from parts of embryos at the age of 6, 8, 10 and 12 days. For each age the  
 1318 same number of body parts was used (5-10) and RNA was resuspended in the same  
 1319 volume of water. Analysis of 3-4 technical replicates is shown. Expression in A+8  
 1320 (abdomen with pleuropodia at stage when the organs first become differentiated)  
 1321 was set as 1. Numbers above A+ expression is fold change from A- of the same age.

1322 **Table 1. Top ten percent of the most abundant transcripts upregulated in the**  
 1323 **highly secreting pleuropodia of *Schistocerca*.**

1324

| Transcript ID  | Protein                                                               | Characteristics                             | Immunity <sup>a</sup> | Cuticle digestion <sup>b</sup> | RPKM   |             | Fold change |
|----------------|-----------------------------------------------------------------------|---------------------------------------------|-----------------------|--------------------------------|--------|-------------|-------------|
|                |                                                                       |                                             |                       |                                | legs   | pleuropodia |             |
| SgreTa0017702  | x                                                                     |                                             |                       |                                | 23.07  | 15186.05    | 658.36      |
| SgreTa0007897  | C-type lysozyme                                                       | anti-bacterial protein                      | x                     |                                | 42.93  | 14452.15    | 336.64      |
| SgreTa0002988  | Uncharacterized, contains DUF4773 domain                              |                                             |                       |                                | 15.16  | 9112.05     | 601.19      |
| SgreTa0005052  | x                                                                     |                                             |                       |                                | 13.37  | 7950.98     | 594.48      |
| SgreTa0001636  | Serine protease                                                       | proteolysis                                 | x                     | x                              | 49.38  | 7578.31     | 153.48      |
| SgreTa0008851  | Chitin binding Peritrophin-A                                          | peritrophic matrix protein                  |                       |                                | 9.12   | 6836.42     | 749.88      |
| SgreTa0017707  | I-type lysozyme                                                       | anti-bacterial protein                      | x                     |                                | 12.20  | 6712.31     | 550.26      |
| SgreTa0007042  | x                                                                     |                                             |                       |                                | 7.04   | 6650.18     | 944.25      |
| SgreTa0004599  | Alpha-tocopherol transfer protein                                     | intermembrane lipid transfer                |                       |                                | 8.99   | 5848.12     | 650.71      |
| SgreTa0009217  | x                                                                     |                                             |                       |                                | 5.03   | 5384.56     | 1070.14     |
| SgreTa0003175  | Collagen                                                              |                                             |                       |                                | 32.25  | 5220.96     | 161.87      |
| SgreTa0007886  | Alpha-N-acetylgalactosaminidase                                       | carbohydrate catabolism                     |                       |                                | 3.85   | 4372.63     | 1134.69     |
| SgreTa0002109  | x                                                                     |                                             |                       |                                | 2.20   | 3016.31     | 1372.07     |
| SgreTa0017715  | Serine protease, Snake-like                                           | proteolysis, Toll signaling                 | x                     | x                              | 70.55  | 2947.46     | 41.78       |
| SgreTa0017664  | Chitinase 5                                                           | cuticular chitin degradation                |                       | x                              | 79.32  | 2620.11     | 33.03       |
| SgreTa0002467  | Neutral endopeptidase 24.11                                           | proteolysis                                 |                       | x                              | 62.26  | 2282.01     | 36.66       |
| SgreTa0004397  | x                                                                     |                                             |                       |                                | 11.21  | 2266.30     | 202.21      |
| SgreTa0002828  | x                                                                     |                                             |                       |                                | 1.77   | 2188.14     | 1234.00     |
| SgreTa0006539  | Serpin, 88E-like                                                      | serine protease inhibitor                   | x                     |                                | 32.42  | 2152.14     | 66.38       |
| SgreTa0001321  | Glycosyl hydrolase, Myrosinase 1-like                                 | carbohydrate catabolism                     |                       |                                | 3.93   | 2070.40     | 527.16      |
| SgreTb0011177  | x                                                                     |                                             |                       |                                | 1.38   | 1884.79     | 1369.32     |
| SgreTa0008335  | x                                                                     |                                             |                       |                                | 54.24  | 1812.38     | 33.41       |
| SgreTa0003635  | Alpha-tocopherol transfer protein                                     | intermembrane lipid transfer                |                       |                                | 2.23   | 1800.68     | 806.99      |
| SgreTb0003860  | Serine protease, H2-like                                              | proteolysis                                 | x                     | x                              | 77.42  | 1727.41     | 22.31       |
| SgreTa0013418  | x                                                                     |                                             |                       |                                | 0.87   | 1484.98     | 1710.66     |
| SgreTa0014009  | Angiotensin-converting enzyme                                         | proteolysis                                 |                       | x                              | 65.76  | 1457.47     | 22.16       |
| SgreTa0006966  | Pro-phenol oxidase subunit 2                                          | immunity, melanization                      | x                     |                                | 144.78 | 1347.43     | 9.31        |
| SgreTa0000425  | 6-phosphofructo-2-kinase                                              | glycolysis                                  |                       |                                | 93.52  | 1346.50     | 14.40       |
| SgreTa0003661  | Serine protease, Easter-like                                          | proteolysis                                 | x                     | x                              | 29.50  | 1332.79     | 45.18       |
| SgreTa0006960  | Glutamate dehydrogenase mitochondrial                                 | nitrogen and glutamate metabolism           |                       |                                | 172.56 | 1327.45     | 7.69        |
| SgreTa0017670  | Xaa-Pro aminopeptidase                                                | proteolysis                                 |                       | x                              | 2.89   | 1322.01     | 457.96      |
| SgreTb0000759  | Cathepsin L                                                           | proteolysis, lysosomal enzyme               |                       | x                              | 105.63 | 1308.36     | 12.39       |
| SgreTa0014684  | x                                                                     |                                             |                       |                                | 1.30   | 1294.87     | 994.80      |
| SgreTa0007025  | Insect pheromone-binding protein A10/OS-D                             | chemoreception                              |                       |                                | 1.77   | 1224.20     | 692.95      |
| SgreTa0006282  | Cytochrome P450 CYP4G102                                              | synthesis of hydrocarbons, anti-dehydration |                       |                                | 2.91   | 1196.27     | 410.93      |
| SgreTa0009515  | Sensory neuron membrane protein, 1-like                               | chemoreception                              |                       |                                | 3.33   | 1188.81     | 357.50      |
| SgreTa0008528  | C-type lysozyme                                                       | anti-bacterial protein                      | x                     |                                | 8.61   | 1159.55     | 134.71      |
| SgreTa0009095  | Catalase                                                              | redox homeostasis                           |                       |                                | 355.15 | 1158.27     | 3.26        |
| SgreTb00039135 | x                                                                     |                                             |                       |                                | 3.53   | 1119.22     | 316.71      |
| SgreTa0001486  | Lipopolysaccharide-induced tumor necrosis factor-alpha factor homolog | lysosomal degradation                       |                       |                                | 45.83  | 1109.33     | 24.20       |
| SgreTb00039012 | x                                                                     |                                             |                       |                                | 14.29  | 1060.82     | 74.25       |
| SgreTa0009747  | Serpin (27-like)                                                      | serine protease inhibitor, melanization     | x                     |                                | 14.49  | 1054.67     | 72.80       |
| SgreTa0013400  | Peroxiredoxin, 5-llke                                                 | redox homeostasis                           | x                     |                                | 101.10 | 1034.15     | 10.23       |
| SgreTa0017395  | x                                                                     |                                             |                       |                                | 5.08   | 1004.86     | 197.64      |
| SgreTa0017712  | x                                                                     |                                             |                       |                                | 15.59  | 990.41      | 63.53       |
| SgreTa0005600  | Beta-N-acetylglucosaminidase NAG2                                     | cuticular chitin degradation                |                       | x                              | 15.10  | 939.60      | 62.21       |
| SgreTa0000783  | Serine protease, Snake-like                                           | proteolysis                                 | x                     | x                              | 4.30   | 917.47      | 213.59      |
| SgreTa0006651  | Uncharacterized, contains Transcription activator MBF2 domain         |                                             |                       |                                | 1.62   | 907.98      | 561.49      |
| SgreTa0017657  | Putative serine protease, K12H4.7-like / Serine carboxypeptidase      | proteolysis                                 |                       | x                              | 2.31   | 904.26      | 391.60      |
| SgreTa0017700  | Peroxidase                                                            | redox homeostasis                           | x                     |                                | 5.36   | 874.51      | 163.25      |
| SgreTa0002600  | Uncharacterized, contains DUF3421 domain                              |                                             |                       |                                | 0.97   | 870.73      | 894.35      |
| SgreTb0019827  | Tob                                                                   | antiproliferative protein,                  |                       |                                | 141.26 | 846.86      | 5.99        |

|               |                                                    |                                                |   |        |        |         |
|---------------|----------------------------------------------------|------------------------------------------------|---|--------|--------|---------|
|               |                                                    | transcription corepressor                      |   |        |        |         |
| SgreTa0017854 | x                                                  |                                                |   | 0.85   | 838.89 | 981.74  |
| SgreTa0007774 | Lysosomal-associated membrane protein              | lysosomal membrane protein                     |   | 185.20 | 822.81 | 4.44    |
| SgreTa0015156 | x                                                  |                                                |   | 27.45  | 804.82 | 29.32   |
| SgreTa0007809 | Tetraspanin                                        | scaffolding protein in cell membrane           |   | 63.04  | 799.76 | 12.69   |
| SgreTa0004471 | Leucine rich repeat                                | membrane glycoprotein                          |   | 74.88  | 797.35 | 10.65   |
| SgreTa0004278 | Fatty acyl-CoA reductase, waterproof-like          | lipid metabolism                               |   | 1.75   | 733.39 | 417.99  |
| SgreTa0014626 | V-type proton ATPase proteolipid subunit           | proton transporting ATPase                     |   | 190.76 | 708.56 | 3.71    |
| SgreTa0016256 | Bax inhibitor 1                                    | negative regulation of apoptosis and autophagy |   | 237.58 | 692.52 | 2.91    |
| SgreTa0001469 | Sodium/potassium-transporting ATPase subunit alpha | sodium:potassium exchanging ATPase             |   | 119.60 | 685.51 | 5.73    |
| SgreTa0007426 | Serine protease, Easter-like                       | proteolysis                                    | x | 0.66   | 673.43 | 1023.60 |
| SgreTa0007081 | Vigilin                                            | RNA binding, sterol metabolism                 |   | 247.46 | 655.61 | 2.65    |
| SgreTa0013328 | Ferritin                                           | iron ion transport, iron sequestration         | x | 238.10 | 651.31 | 2.74    |
| SgreTa0002155 | Uncharacterized serine protease inhibitor          | serine protease inhibitor                      | x | 33.83  | 646.73 | 19.12   |
| SgreTa0014303 | x                                                  |                                                |   | 176.21 | 645.78 | 3.66    |
| SgreTa0017577 | Aquaporin                                          | water channel                                  |   | 0.39   | 635.34 | 1638.96 |
| SgreTa0013377 | Phosphoenolpyruvate carboxykinase [GTP]            | gluconeogenesis                                |   | 13.56  | 628.95 | 46.37   |
| SgreTa0005752 | Alpha-tocopherol transfer protein                  | intermembrane lipid transfer                   |   | 12.98  | 594.56 | 45.79   |
| SgreTa0014098 | Phospholipase B-like                               | lipid degradation                              |   | 206.76 | 577.99 | 2.80    |
| SgreTa0000856 | Transposase-like                                   |                                                |   | 25.93  | 576.67 | 22.24   |
| SgreTa0008861 | x                                                  |                                                |   | 0.37   | 541.63 | 1456.67 |
| SgreTa0017826 | Sodium:neurotransmitter symporter                  | solute:sodium symport                          |   | 0.49   | 540.53 | 1104.10 |
| SgreTb0019287 | x                                                  |                                                |   | 3.11   | 528.47 | 169.79  |
| SgreTa0015520 | Protein yellow                                     | melanization                                   | x | 2.75   | 520.09 | 189.08  |
| SgreTb0006243 | I-type lysozyme                                    | anti-bacterial protein                         | x | 16.96  | 519.35 | 30.62   |
| SgreTa0009559 | Gram-negative bacteria binding protein 3           | pathogen recognition                           | x | 15.40  | 510.04 | 33.13   |

1325

1326 <sup>a</sup> proteins related to immune response

1327 <sup>b</sup> proteins that participate in larval moulting; some of them are known, other

1328 anticipated to digest cuticular chitin and protein (e.g., present in the MF)



1329 **Table 2. RNA-seq differential gene expression of cuticular chitin degrading**  
1330 **enzymes in the highly secreting pleuropodia of *Schistocerca*.**  
1331  
1332 (see below)  
1333  
1334 <sup>a</sup> upregulated (UP)/ downregulated (DOWN)  
1335 <sup>b</sup> the DEGs (781 upregulated) were ranked according to their RPKM in descending  
1336 order, the number describes the position of the DEG in the ranked table; transcripts  
1337 in bold were among the top 25% most abundant  
1338 <sup>c</sup> not applicable (expression low to undetectable in both samples, transcript filtered  
1339 out)  
1340 <sup>d</sup> not significant  
1341

| Family                   | Group                                 | Protein      | <i>Schistocerca</i> gene | UP/DOWN <sup>a</sup> | Fold change | Expression <sup>b</sup> |
|--------------------------|---------------------------------------|--------------|--------------------------|----------------------|-------------|-------------------------|
| β-N-acetylhexosaminidase | I                                     | NAG1         | <i>Sg-nag1</i>           | UP                   | 7.85        | 124 (15.88%)            |
|                          | II                                    | NAG2         | <i>Sg-nag2</i>           | UP                   | 62.21       | 46 (5.89%)              |
|                          | III                                   | Fused lobes  | <i>Sg-fdl</i>            | UP                   | 14.18       | 592 (75.8%)             |
|                          | IV                                    | Hex          | <i>Sg-hex</i>            | UP                   | 47.37       | 306 (39.18%)            |
| chitinase                | I-Major "moulting" chitinases         | Chitinase 5  | <i>Sg-cht5-1</i>         | UP                   | 33.03       | 15 (1.92%)              |
|                          |                                       |              | <i>Sg-cht5-2</i>         | UP                   | 234.78      | 400 (51.21%)            |
|                          | II-"Moulting" chitinases              | Chitinase 10 | <i>Sg-cht10-1</i>        | na <sup>c</sup>      |             |                         |
|                          |                                       |              | <i>Sg-cht10-2</i>        | ns <sup>d</sup>      |             |                         |
|                          | III-Cuticle assembly chitinases       | Chitinase 7  | <i>Sg-cht7-1</i>         | ns                   |             |                         |
|                          |                                       |              | <i>Sg-cht7-2</i>         | ns                   |             |                         |
|                          |                                       |              | <i>Sg-cht7-3</i>         | ns                   |             |                         |
|                          | IV-Gut, fat body and other chitinases | Chitinase 8  | <i>Sg-cht8-1</i>         | na                   |             |                         |
|                          |                                       |              | <i>Sg-cht8-2</i>         | na                   |             |                         |
|                          |                                       |              | <i>Sg-cht8-3</i>         | na                   |             |                         |
|                          |                                       | Chitinase 6  | <i>Sg-cht6-1</i>         | ns                   |             |                         |
|                          |                                       |              | <i>Sg-cht6-2</i>         | ns                   |             |                         |
|                          |                                       | Chitinase 2  | <i>Sg-cht2</i>           | UP                   | 2.81        | 188 (24.07%)            |
|                          | V-Imaginal disc growth factors        | IDGF         | <i>Sg-idgf-1</i>         | UP                   | 20.97       | 391 (50.06%)            |
|                          |                                       |              | <i>Sg-idgf-2</i>         | ns                   |             |                         |
|                          |                                       |              | <i>Sg-idgf-3</i>         | ns                   |             |                         |

1343 **Table 3. MF proteases that were upregulated in the highly secreting**  
 1344 **pluropodia of *Schistocerca*.**

1345

| <i>Schistocerca</i>                                      |                          |                            |                              |          |                |
|----------------------------------------------------------|--------------------------|----------------------------|------------------------------|----------|----------------|
| MF protein <sup>a</sup>                                  | Blast query <sup>b</sup> | transcript ID <sup>c</sup> | homolog/similar <sup>d</sup> | RPKM PLP | Fold change UP |
| Putative peptidase                                       | D2KMR2                   | SgreTa0000627              | similar                      | 131.75   | 3.14           |
| Aminopeptidase N-12                                      | I3VR83                   | SgreTb0018983              | similar                      | 35.86    | 4.35           |
| Neutral endopeptidase                                    | Q9BLH1                   | <b>SgreTa0002467</b>       | similar                      | 2282.01  | 36.66          |
| 24.11                                                    |                          |                            |                              |          |                |
|                                                          | Q9BLH1                   | SgreTa0017692              | similar                      | 133.30   | 240.28         |
|                                                          | Q9BLH1                   | SgreTb0039123              | similar                      | 219.35   | 186.96         |
| Ecdysteroid-inducible                                    | Q9NDS8                   | <b>SgreTa0014009</b>       | similar                      | 1457.47  | 22.16          |
| angiotensin-converting<br>enzyme                         |                          |                            |                              |          |                |
|                                                          | Q9NDS8                   | SgreTa0017728              | similar                      | 62.71    | 57.08          |
| Carboxypeptidase E-like                                  | H9IST0                   | SgreTa0000925              | homolog                      | 139.81   | 10.95          |
| Angiotensin-converting<br>enzyme-like                    | H9IZ41                   | SgreTa0003298              | homolog                      | 23.64    | 5.65           |
| Aminopeptidase N-like                                    | H9JEW9                   | SgreTa0017219              | homolog                      | 391.03   | 437.93         |
| Digestive cysteine<br>protease 1, cathepsin L            | H9JHZ1                   | SgreTa0000627              | homolog                      | 131.75   | 3.14           |
| Serine carboxypeptidase                                  | H9J242                   | <b>SgreTa0017657</b>       | homolog                      | 904.26   | 391.60         |
| Serine protease HP21<br>precursor                        | H9JJA9                   | SgreTa0017649              | similar                      | 179.69   | 24.45          |
| Trypsin-like serine<br>protease - fibroin heavy<br>chain | H9JPA8                   | <b>SgreTa0001636</b>       | homolog                      | 7578.31  | 153.48         |
| Serine protease, Easter-<br>like                         | Q2VG86                   | SgreTa0003188              | homolog                      | 485.97   | 837.45         |
|                                                          | Q2VG86                   | <b>SgreTa0003661</b>       | homolog                      | 1332.79  | 45.18          |
|                                                          | Q2VG86                   | SgreTa0006780              | homolog                      | 103.37   | 14.76          |

|                             |        |                      |         |         |        |
|-----------------------------|--------|----------------------|---------|---------|--------|
|                             | Q2VG86 | SgreTa0007424        | homolog | 29.62   | 79.13  |
|                             | Q2VG86 | SgreTa0007425        | homolog | 123.69  | 72.31  |
|                             | Q2VG86 | SgreTb0037249        | homolog | 21.76   | 249.74 |
|                             | Q2VG86 | SgreTb0039879        | homolog | 305.63  | 544.04 |
|                             | H9JLZ4 | SgreTa0010219        | similar | 46.12   | 20.75  |
|                             | H9JLZ4 | SgreTb0039024        | similar | 11.71   | 22.11  |
| Serine protease 1           | H9JXY6 | <b>SgreTb0003860</b> | homolog | 1727.41 | 22.31  |
| Serine protease, Snake-like | H9IWW2 | <b>SgreTa0000783</b> | similar | 917.47  | 213.59 |

---

1346

1347 <sup>a</sup> proteomic sequencing of MF of the lepidopteran *Bombyx mori* (Zhang et al., 2014;  
1348 Liu et al., 2018)

1349 <sup>b</sup> Uniprot ID for blast on *Schistocerca* transcriptome

1350 <sup>c</sup> transcripts in bold were among the top ten percent most highly "expressed"

1351 upregulated DEGs (Table 1)

1352 <sup>d</sup> considered as homologous, if reciprocal blast retrieved the query sequence

1353

1354 **Table 4. RNA-seq differential gene expression of *Schistocerca* lysozymes in the**  
1355 **highly secreting pleuropodia.**

1356

---

| Lysozyme type   | Gene                 | UP/DOWN <sup>a</sup> | Fold change   | Expression <sup>b</sup> |
|-----------------|----------------------|----------------------|---------------|-------------------------|
| C-type lysozyme | <i>Sg-LyzC-1</i>     | UP                   | <b>336.64</b> | <b>2 (0.26%)</b>        |
|                 | <i>Sg-LyzC-2</i>     | UP                   | <b>134.71</b> | <b>37 (4.74%)</b>       |
| I-type lysozyme | <i>Sg-LyzI-1</i>     | UP                   | <b>550.26</b> | <b>7 (0.90%)</b>        |
|                 | <i>Sg-LyzI-2</i>     | ns <sup>c</sup>      |               |                         |
|                 | <i>Sg-LyzI-3</i>     | UP                   | <b>30.62</b>  | <b>76 (9.73%)</b>       |
|                 | <i>Sg-LyzI-4</i>     | DOWN                 | -34.41        | 1251 (81.50%)           |
|                 | <i>Sg-LyzI-5</i>     | ns                   |               |                         |
| Lysozyme-like   | <i>Sg-Lyz-like-1</i> | UP                   | <b>192.68</b> | <b>150 (19.21%)</b>     |
|                 | <i>Sg-Lyz-like-2</i> | ns                   |               |                         |

---

1357

1358 <sup>a</sup> upregulated (UP)/ downregulated (DOWN)

1359 <sup>b</sup> the DEGs (781 upregulated) were ranked according to their RPKM in descending

1360 order, the number (percentage) describes the position of the DEG in the ranked

1361 table; transcripts in bold were among the top 25% most abundant

1362 <sup>c</sup> not significant

1363 **Table 5. RNA-seq differential gene expression of *Schistocerca ecdysone***  
1364 **biosynthesis enzymes in the highly secreting pleuropodia.**

1365

---

| Gene                               | UP/DOWN <sup>a</sup> | Fold change | Expression <sup>b</sup> |
|------------------------------------|----------------------|-------------|-------------------------|
| <i>shade (shd), Cyp314A1</i>       | ns <sup>c</sup>      |             |                         |
| <i>shadow (sad), Cyp315A1</i>      | ns                   |             |                         |
| <i>disembodied (dib), Cyp302A1</i> | UP                   | 5.71        | 431 (55%)               |
| <i>phantom (phm), Cyp306A1</i>     | ns                   |             |                         |
| <i>shroud (sro)</i>                | ns                   |             |                         |
| <i>spook (spo), Cyp307A1</i>       | DOWN                 | -12.32      | 1368 (89%)              |
| <i>spook-like</i>                  | ns                   |             |                         |
| <i>neverland (nvd)</i>             | ns                   |             |                         |
| <i>Cyp6t3</i>                      | not found            |             |                         |
| <i>Cyp6u1</i>                      | na <sup>d</sup>      |             |                         |
| <i>Cyp303a1</i>                    | ns                   |             |                         |

---

1366

1367 <sup>a</sup> upregulated (UP)/ downregulated (DOWN)

1368 <sup>b</sup> the DEGs (781 upregulated and 1535 downregulated) were ranked according to  
1369 their RPKM in descending order, the number (percentage) describes the position of  
1370 the DEG in the ranked table

1371 <sup>c</sup> not significant

1372 <sup>d</sup> not applicable (expression low to undetectable in both samples, transcript filtered  
1373 out)
